# 1 Multi-area recordings and optogenetics 2 in the awake, behaving marmoset

3 Patrick Jendritza<sup>1,2</sup>, Frederike J. Klein<sup>1</sup> and Pascal Fries<sup>1,2,3</sup>

4 1. Ernst Strüngmann Institute (ESI) for Neuroscience in Cooperation with Max Planck Society, Frankfurt, Germany

5 2. International Max Planck Research School for Neural Circuits, Frankfurt, Germany

6 3. Donders Institute for Brain, Cognition and Behaviour, Radboud University Nijmegen, Nijmegen, Netherlands

7 Correspondence: [patrick.jendritza@esi-frankfurt.de](mailto:patrick.jendritza@esi-frankfurt.de)

## 8 Abstract

9 The common marmoset has emerged as a key primate model in neuroscience. Marmosets are  
10 small in size, show great potential as transgenic models and exhibit complex behaviors. These  
11 advantages place the marmoset model in the critical gap between rodents and larger primates.  
12 Thus, it is necessary to develop technology that enables monitoring and manipulation of the  
13 neural circuits underlying the behavior of the marmoset. Here, we present a novel approach to  
14 record and optogenetically manipulate neural activity in the awake, behaving marmoset. Our  
15 design utilizes a light-weight, 3D printed titanium chamber that can house several high-density  
16 silicon probes for semi-chronic recordings, while enabling simultaneous optogenetic stimulation.  
17 Surgical procedures are streamlined via custom 3D printed guides and implantation holders. We  
18 demonstrate the application of our method by recording multi- and single-unit data from areas V1  
19 and V6 with 192 channels simultaneously, and show for the first time that optogenetic activation  
20 of excitatory neurons in area V6 can influence behavior in a detection task. Together, the work  
21 presented here will support future studies investigating the neural basis of perception and  
22 behavior in the marmoset.

## 23 Introduction

24 The common marmoset (*Callithrix jacchus*) is becoming an important animal model in  
25 neuroscience (Solomon and Rosa, 2014; Miller, 2017; Servick, 2018; Okano, 2021). Due to its  
26 small size, genetic tractability (Sasaki et al., 2009; Tomioka et al., 2017; Sato et al., 2020) and  
27 complex behavioral repertoire (Stevenson and Poole, 1976; Mitchell and Leopold, 2015; Miller et  
28 al., 2016), it is placed in the critical gap between rodent models and larger primate models. Thus,  
29 marmosets hold great potential for improving our understanding of the neural circuits underlying  
30 complex behaviors and perception. It is therefore pivotal to develop techniques that enable  
31 monitoring and manipulation of these circuits in awake, behaving animals.

32 Many important technical advancements in neuroscience research with marmosets have been  
33 achieved in recent years. For example, the method of calcium imaging has been established as  
34 a promising optical alternative to monitor activity of individual neurons (Yamada et al., 2016;  
35 Kondo et al., 2018; Mehta et al., 2019). Nevertheless, extracellular single unit recordings remain  
36 the essential method in systems neuroscience due to their unparalleled temporal resolution and  
37 ability to record from almost any location in the brain (Steinmetz et al., 2018). Technical  
38 improvements in extracellular single unit recordings in awake marmosets were initially driven by  
39 the field of auditory research (Eliades and Wang, 2008; Remington et al., 2012; Roy and Wang,  
40 2012). These recordings mostly utilized tungsten microelectrodes, which have limitations in terms  
41 of electrode density and geometric arrangement of recording sites. To overcome these issues,  
42 silicon-based microelectrode arrays have recently been established in awake marmosets  
43 (Johnston et al., 2019; Pomberger and Hage, 2019; Davis et al., 2020; Walker et al., 2021). These  
44 contributions have paved the way for better access to the neural circuits of the marmoset brain.

45 There exists a substantial body of work on the visual cortex of the marmoset (for comprehensive  
46 reviews, see Solomon and Rosa, 2014 and Mitchell and Leopold, 2015). However, the

47 characterization of response properties of neurons is almost entirely based on experiments  
48 performed under anesthesia. In contrast, data from visual areas in awake marmosets is still very  
49 scarce (Porada et al., 2000; Johnston et al., 2019; Davis et al., 2020). Even more strikingly, there  
50 is only one study of single unit recordings in awake marmoset primary visual cortex (V1) (Porada  
51 et al., 2000), in stark contrast to the wealth of studies on this area in other species. Hence, the  
52 relative lack of published work in awake animals emphasized the need to develop suitable  
53 recording approaches.

54 Technical as well as conceptual advancements have revealed that computations in the brain are  
55 carried out by populations of neurons (Saxena and Cunningham, 2019). These populations are  
56 distributed within and across areas (Poggio, 2011; Panzeri et al., 2015). Thus, it is of great interest  
57 to be able to record from both, local populations, and from distributed populations across multiple  
58 areas simultaneously. For this reason, implant designs should be compatible with modern  
59 electrode technology, such as high-density silicon probes optimized for these applications, and  
60 they should ideally allow to target multiple brain regions simultaneously (Shobe et al., 2015;  
61 Steinmetz et al., 2021).

62 Importantly, beyond the correlative evidence that can be obtained from neural recordings, direct  
63 manipulation of neural activity can be used to gain insight into the causal link between neural  
64 circuits and behavior (Wolff and Ölveczky, 2018). Optogenetics is a powerful tool for such  
65 questions, because it offers the necessary spatiotemporal and genetic precision (Fenno et al.,  
66 2011). The principal feasibility of optogenetic stimulation techniques in marmosets has already  
67 been demonstrated (Macdougall et al., 2016; Komatsu et al., 2017; Ebina et al., 2019). However,  
68 the integration of neural recordings, optogenetics and behavioral manipulation is still lacking.  
69 Therefore, the aim of this work was to integrate these components into a well-engineered design  
70 that enables state-of-the art experimental access in the awake, behaving marmoset.

71 The approach presented here is based on semi-chronic recordings from multiple high-density  
72 silicon probes. It makes use of a light-weight titanium chamber, fabricated with metal 3D-printing  
73 technology, while surgical procedures are streamlined by means of 3D printed guides and  
74 implantation holders. We demonstrate multi- and single-unit recordings from two visual areas with  
75 192 channels simultaneously and show that optogenetic stimulation of visual area V6 can  
76 influence the animal's behavior in a perceptual detection task. Thus, we demonstrate for the first  
77 time neural recordings and optogenetic stimulation in combination with behavioral manipulation  
78 in the awake behaving marmoset.

## 79 Results

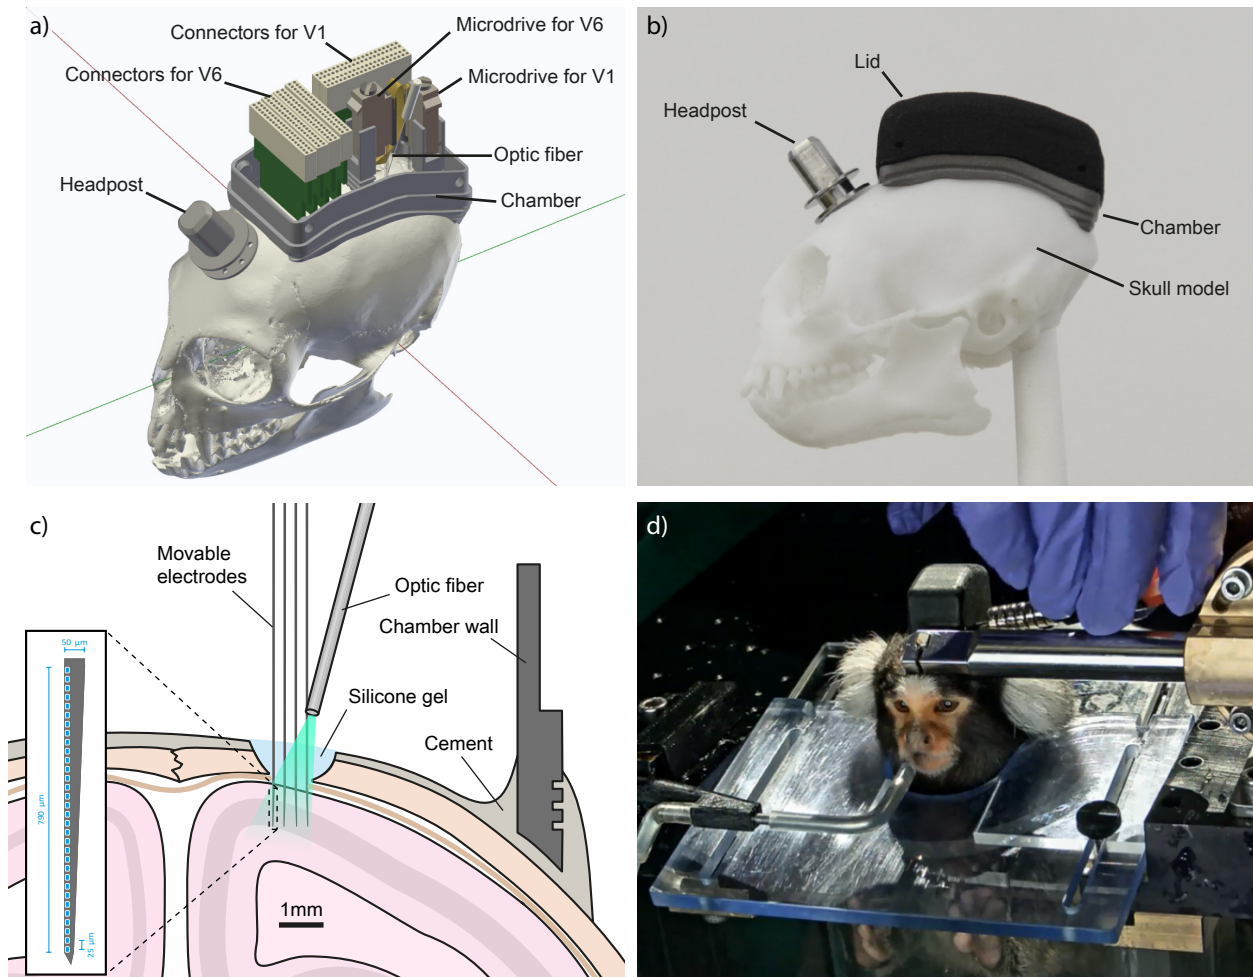

80  
81 **Figure 1 | Implant design and recording approach.** a) 3D rendering of the complete 192-channel implant design. A  
82 four-shank silicon probe with 4x32 channels is attached to the microdrive targeting area V6. A two-shank silicon probe  
83 with 2x32 channels is targeting area V1. The four connectors at the anterior end of the chamber are wired to the probe  
84 in area V6. The two connectors at the posterior right side of the chamber are routed to the probe in V1. An optic fiber  
85 (200  $\mu\text{m}$  diameter) is placed above the V6 craniotomy with an external micromanipulator (not shown for clarity). The  
86 headpost for stabilizing the animal during recording is placed in front of the chamber. b) Side view photograph of a skull  
87 model with headpost, chamber and flat lid as used after implantation of headpost and chamber. c) Illustration of a  
88 coronal section of the target location in area V6. Craniotomy, electrodes and chamber are drawn to scale. Inset shows  
89 magnified view of electrode layout. d) Photograph of Monkey A while head-fixed and facing the monitor, during opening  
90 of the tall lid used after electrode implantation. The photograph shows the animal with the final 192-channel implant.

## 91 Implant design and recording approach

92 Our goal was to design a small and lightweight implant that utilizes modern high-density silicon  
93 probes while providing access to optogenetic stimulation techniques in awake behaving  
94 marmosets.

95 The complete implant consists of multiple parts: Headpost, chamber, microdrives, stabilizers,  
96 silicon probes and printed circuit boards (PCBs) holding the connectors (Fig. 1a). The 3D printed  
97 titanium chamber was designed to smoothly fit onto the surface of the marmoset skull (Fig. 1a, b).  
98 This was achieved by using a computed tomography (CT)-based skull model as anatomical  
99 reference for the curvature of the bottom of the chamber. The chamber houses six PCBs with  
100 connectors, which relay the neural signals from two silicon probe arrays: A four-shank 4x32  
101 channel silicon probe is attached to a microdrive targeting visual area V6. A two-shank 2x32  
102 channel silicon probe is located at the posterior end of the chamber to target visual area V1,  
103 amounting to a total of 192 channels. Both probes are implanted in the left hemisphere (Fig. 1a).

104 It is often advantageous to be able to move electrodes to a new recording position after signal  
105 decay, or in order to target a particular depth within the brain structure of interest. Therefore, we  
106 mounted the probes to microdrives which allow for up to 5 mm vertical travel. This makes it  
107 possible to change the recording position along the depth axis if required. Both microdrives are  
108 attached to titanium stabilizers that are 3D printed from the same material as the chamber. The  
109 stabilizers are intended to provide additional rigidity after implantation. Furthermore, they  
110 minimize the gap between the bottom of the microdrive and the skull, which needs to be filled with  
111 cement during implantation. Thus, the stabilizers also make the implantation process easier and  
112 faster.

113 Silicon probes are implanted through a small ( $\approx 2$  mm diameter) craniotomy (Fig. 1c). After  
114 superficial insertion of the probes into the brain, the craniotomy is sealed with a transparent

115 silicone gel (Jackson and Muthuswamy, 2008). Optogenetic stimulation can then be performed  
116 by pointing an optic fiber at the craniotomy such that the light penetrates through the silicone into  
117 the tissue (Fig. 1c). The optic fiber is held by an external micromanipulator that guarantees flexible  
118 and precise positioning.

119 To allow stabilization of the animal's head during recordings, a headpost was implanted in front  
120 of the chamber (Fig. 1a, b). Both, the headpost as well as its holder (Fig. 1d) were produced by  
121 standard CNC milling from medical-grade titanium (Ti6Al4V). 3D printing was not viable here,  
122 because it does not offer the precision necessary for the fit between headpost and its holder,  
123 without substantial post-processing (Chen et al., 2017). However, alternative headpost designs  
124 could overcome this limitation (see Discussion).

125 The inside of the chamber is protected by a 3D printed nylon lid that can be secured by four small  
126 screws on the side of the implant (Fig. 1a, d). Threads for the screws were manually added after  
127 3D printing. The use of 3D printed lids makes it possible to rapidly and flexibly produce multiple  
128 versions of lids. Before electrode implantation, the inside of the chamber does not contain any  
129 parts other than the (optional) reference wires. Therefore, the initial version of the lid was flat and  
130 could later be replaced by a taller version. This procedure allowed the animals to gradually get  
131 habituated to the size and weight of the final implant. Fig. 1b, shows a photograph of the chamber  
132 on a skull model with the flat version of the lid and the headpost in place.

133 We implanted chamber and headpost in five animals (Table 1). All animals tolerated the implant  
134 well, without the necessity of post-implantation wound care. None of the 3D printed nylon lids did  
135 require replacement, even after several months of use with almost daily opening and closing.  
136 Three of the five animals were subsequently implanted with electrodes in areas V1 and V6.  
137 Figure 1d shows a photograph of the final implant in Monkey A during opening of the lid just prior  
138 to electrophysiological recording.



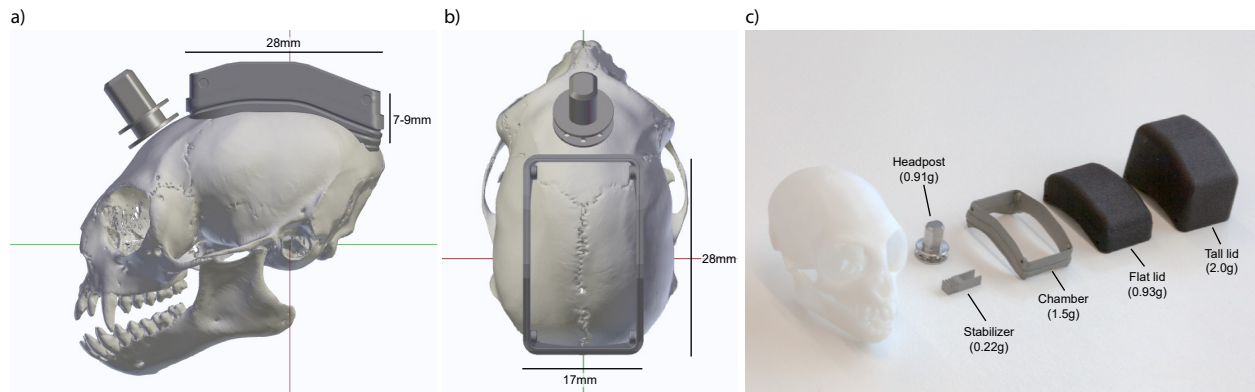

139  
140 **Figure 2 | Implant size and weight.** 3D rendering of side view (a) and top view (b) of a marmoset skull with headpost  
141 and chamber in target position, aligned in stereotaxic coordinates. Red line indicates interaural axis. Green line  
142 indicates anterior-posterior axis. c) Photograph of the CNC machined and 3D printed parts of the implant next to a skull  
143 model. Weights are indicated in parentheses.

144 Size and weight minimization of an implant are important design factors when working with small  
145 animals. These factors are not only crucial in order to ensure the welfare of the animal, but also  
146 facilitate the study of natural behaviors (Kondo et al., 2018; Courellis et al., 2019).

147 The chamber was designed to span 28 mm in the anterior-posterior axis and 17 mm in the medio-  
148 lateral axis of the skull (Fig. 2 a, b; outer chamber dimensions). We restricted the lateral extent of  
149 the chamber such its implantation required only minimal detachment of the temporal muscle from  
150 the bone. Consequently, no resection of the muscle was necessary. The sides of the chamber  
151 extended laterally only 1-2 mm beyond the superior temporal lines of the skull. This design allows  
152 targeting a large number of dorsal brain areas for neural recording and stimulation (Suppl. Fig. 1).

153 The height of the final implant depends on the selection of electrodes and connectors inside the  
154 chamber. The chamber itself (without lid) protrudes only 7-9 mm from the surface of the skull.  
155 When closed with the flat lid (e.g. without probes installed), it reaches a height of 12-14 mm from  
156 the skull. After implantation with silicon probes and connector PCBs as used here, the chamber  
157 is closed with a taller version of the lid, and the implant reaches a height of 20-22 mm from the  
158 skull.



159 The total weight of the implant depends on its size and the density of the materials that are used.  
160 Recent advancements in metal 3D printing make it possible to accurately produce complex  
161 shapes from medical-grade titanium (Ti6Al4V). The mechanical strength of titanium allowed us to  
162 reduce the wall thickness of the chamber to 0.5-1 mm (Fig. 1c and Fig. 2b), which resulted in a  
163 weight of only 1.5 g for the chamber (Fig. 2c). Headpost and stabilizers had a weight of 0.91 g  
164 and 0.22 g, respectively. Lids were produced from a polyamide (PA12 nylon). Polyamides such  
165 as nylon show exceptional tensile strength, resistance to abrasion and can be 3D printed in a  
166 cost-effective way (O'Connor et al., 2018). Weights of the lids for the flat and tall version were  
167 0.93 g and 2.0 g, respectively. Thus, the total resulting weight of the implant was approximately  
168 only 8 g, including headpost, chamber, silicon probes, microdrives, stabilizers, connectors and  
169 cement.

170 The implant design presented in this work combines several significant improvements over  
171 existing methods. It is small and extremely lightweight and enables recordings with a large  
172 number of channels as well as access for optogenetic stimulation. Because most parts are 3D  
173 printed, they can be manufactured very quickly at low cost and can be rapidly adapted for other  
174 methods such as calcium imaging or functional ultrasound imaging.

## 175 Two-stage implantation procedure

176 Surgeries for experiments of the type described here often include a number of critical steps, such  
177 as: precise alignment of several independent parts, insertion of electrodes in multiple target areas  
178 and injection of viral vectors. Performing any of these steps is challenging even individually, and  
179 combining all of them in one surgery increases the risk of failure. To maximize chances of surgical  
180 success, we adopted a two-stage implantation procedure and made use of customized 3D printed  
181 implantation holders. First, headpost and chamber were implanted in the same initial surgery

182 (Surgery 1). After appropriate recovery time, a second surgery was performed, in which a viral  
183 vector was injected and several silicon probes were implanted (Surgery 2).

## 184 Surgery 1: Implantation of chamber and headpost

185 At the beginning of the first surgery, the animal was placed in a stereotaxic apparatus, and the  
186 skull was prepared for the implant (see Materials and Methods). Chamber and headpost could  
187 then be lowered onto the skull surface for alignment. Precise alignment of the chamber relative  
188 to the skull was crucial, because it ensured that the chamber could later be used as positional  
189 reference for the stereotaxic coordinate system. Both, chamber and headpost were held by a  
190 custom implantation holder that was attached to a micromanipulator (Fig. 3a). Prior to the surgery,  
191 cross-shaped markers on the sides of the holder were used for alignment to the interaural line  
192 (i.e. the axis of the ear bars). This assured correct positioning of the chamber in the anterior-  
193 posterior axis. During the surgery, a downward-pointing wedge integrated into the holder was  
194 aligned to the central skull suture, to assure correct positioning in the medio-lateral axis  
195 (Fig. 3a). After alignment, the position of the holder was locked, and the holder was temporarily  
196 removed to allow better access for the subsequent surgical steps.

197 Marmosets have thin skulls and a narrow subdural space, which can make the use of bone screws  
198 problematic. Therefore, we used only dental adhesive and cement to secure the implant to the  
199 skull (Johnston et al., 2018). To this end, the skull surface was cleaned, roughened with a metal  
200 brush and coated with dental adhesive before a thin layer of cement was applied. Two platinum  
201 wires were implanted epidurally anterior to the chamber, serving as backup reference wires. Next,  
202 the implantation holder was returned to the previously determined antero-posterior and medio-  
203 lateral position, and lowered until the chamber contacted the skull. Following a final visual  
204 inspection of alignment, the headpost and chamber were cemented in place (Fig. 3b). After the  
205 cement had hardened, headpost and chamber were released from the holder (Fig. 3c). At the end

206 of the surgery, the flat version of the 3D printed nylon lid was used to close the chamber (Fig. 3d).  
207 The animal was then allowed to recover for two weeks and subsequently underwent head-fixation  
208 training.

209 Variability in head morphology between animals can lead to inaccuracies during stereotaxic  
210 surgeries. Therefore, after the first surgery, we obtained anatomical data of the skull and implant  
211 via computed tomography (CT) scans (Fig. 3e-g). Appropriate thresholding of the CT images  
212 allowed segmentation of the bone (shown in transparent gray), and of metal and radio-opaque  
213 cement (shown in green). The cement layer in the center of the chamber was very thin and is  
214 therefore not visible everywhere in the segmented data, even though the skull inside the chamber  
215 was completely covered with cement. Also, note that the platinum wires appear thicker than they  
216 actually are due to the high CT contrast of the metal.

217 After segmentation, the inside of the animal-specific skull model was used to fit an MRI-based  
218 template marmoset brain (Liu et al., 2018). This approach can be justified under the assumption  
219 that the gap between bone and the brain is very small. Fits were performed manually by  
220 translating and scaling in all three spatial dimensions, and rotating in the pitch axis. The resulting  
221 fit of the template brain and its area delineations can then serve as individualized anatomical  
222 reference for each animal. Thereby, we obtained the precise positions of our target areas in the  
223 same reference frame as the chamber visible in the CT. Note that this CT-based targeting  
224 refinement was only used in marmosets D and U.

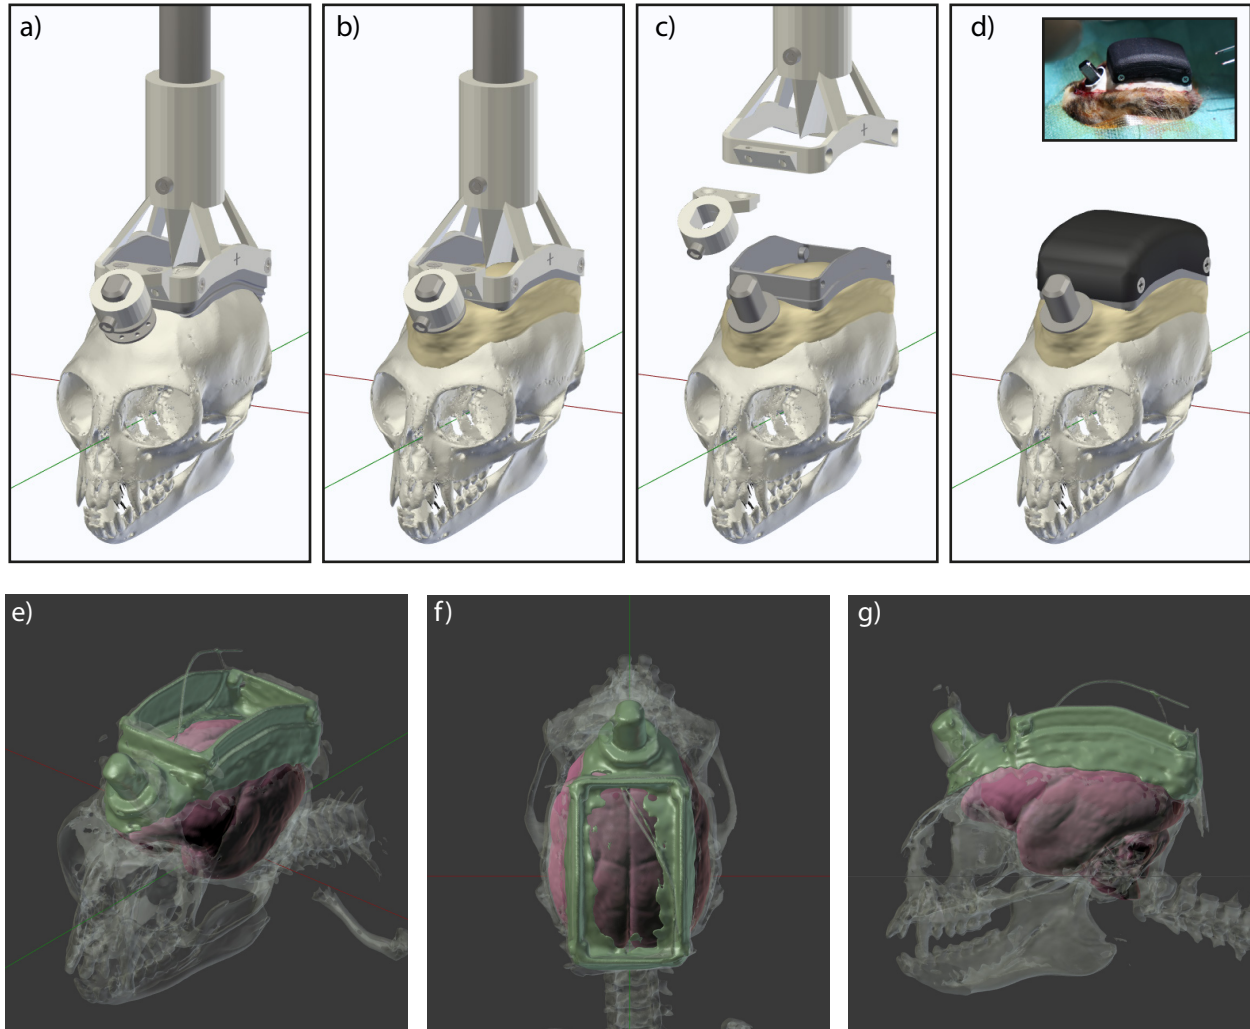

225

226 **Figure 3 | Surgery 1: Implantation of chamber and headpost.** a) Chamber and headpost were held by a custom  
227 implantation holder that was attached to a micromanipulator. Note the cross-shaped markers on the side of the holder,  
228 used for alignment to the interaural axis, prior to the surgery. A wedge-shaped guide pointing downwards in the center  
229 of the holder was used for medio-lateral alignment to the central skull suture. b) Following skull preparation, the aligned  
230 chamber and headpost were cemented onto the skull. c) Once the cement had hardened, chamber and headpost were  
231 released from the holder. d) The chamber was closed with a 3D printed nylon lid for protection. Inset shows photograph  
232 of the implant at the end of the first surgery. e) Near-isometric projection, f) top view and g) side view of the 3D  
233 segmentation from a CT scan after the first surgery in monkey D. Radio-opaque cement, metal parts and reference  
234 wires show the highest contrast and are colored in green. Bone is shown in semi-transparent gray. The fitted MRI-  
235 based template brain is shown in red.

## 236 Surgery 2: Injection of the viral vector and implantation of silicon probes

237 To assure correct positioning in the second surgery, the implantation holder from the first surgery  
238 (Fig. 3a-c) was used to re-align the animal's head via the previously implanted chamber: After  
239 ensuring sufficient depth of anesthesia, the lid was removed, and the chamber attached to the  
240 animals' skull was re-inserted into the holder. This effectively re-aligned the skull of the animal to  
241 precise stereotaxic coordinates as defined by the holder and the chamber. Subsequently, a high-  
242 precision articulated arm was used to fix the animals' head position via the implanted headpost.  
243 After locking the articulated arm, the chamber holder was removed. Thus, the use of ear bars and  
244 eye bars could be avoided in the second surgery, thereby reducing potential discomfort for the  
245 animal.

246 Next, the inside of the chamber was disinfected with H<sub>2</sub>O<sub>2</sub> and ethanol. A 3D printed guide was  
247 temporarily placed on the chamber and used to mark the target positions for the craniotomies  
248 over areas V1 and V6 of the left hemisphere (Supplementary Fig. 2). In Monkey A, coordinates  
249 for the guide were based on Paxinos et al., 2012, in monkeys D and U, coordinates were based  
250 on area delineations of Liu et al., 2018 after CT-based fitting to the individual animal, as described  
251 above.

252 Two platinum wires, serving as reference electrodes, were then implanted subdurally at the  
253 anterior end inside the chamber, through a small burr hole (≈2 mm diameter). Next, two small burr  
254 holes were made at the target locations for the electrodes over V1 and V6. A durotomy of  
255 approximately 1.5 mm was performed over area V6, and the viral vector was injected (Fig. 4a).  
256 After a short waiting time for diffusion of the vector into the tissue, the needle was slowly  
257 retracted.

258 A custom 3D printed implantation holder was then lowered into the chamber (Fig. 4b). The holder  
259 was prepared prior to the surgery to hold all necessary components for the implantation: two

260 microdrives (with silicon probes and stabilizers attached) and six connector PCBs. The three main  
261 components (connector PCBs, V1 microdrive with probes and V6 microdrive with probes) were  
262 held by separate parts of the implantation holder, enabling independent movement in the z-axis.  
263 This independence allowed sequential implantation of the components. To this end, the holder  
264 was initially prepared such that the connector PCBs were at the lowest position and were thus  
265 implanted first (Fig. 4b). Connector PCBs were positioned via the micromanipulator just above  
266 the cement layer on the skull, and were then cemented in place. After curing, the part of the  
267 implantation holder securing the connector PCBs was removed (Fig. 4c). This resulted in better  
268 visibility and allowed for independent movement of the microdrives holding the silicon probes (Fig.  
269 4c). Next, the probe array for area V6 was implanted. In order to insert the silicon probe into the  
270 cortex at the optimal position relative to the durotomy and the local cortical vasculature, the  
271 antero-posterior and medio-lateral positions of the implantation holder were fine-tuned before  
272 probe insertion. After the probe was slowly inserted into the superficial part of the cortex  
273 (<500  $\mu\text{m}$ ), the microdrive with its attached stabilizer were cemented into the chamber.  
274 Subsequently, the part of the implantation holder that was securing the V6 microdrive was  
275 removed, too. The same procedure was performed for area V1, and the implantation holder was  
276 completely removed (Fig. 4d). Both craniotomies were then sealed with soft silicone gel (Fig. 1c).  
277 Animals recovered very quickly after the second surgery and were brought into the recording  
278 setup within a few days. To visually inspect the position of the microdrives and PCBs, we obtained  
279 a CT scan from Monkey A after the second surgery (Figures 4 e-g). The high contrast metal parts  
280 of the connectors and microdrives with stabilizers are visible in green color. Bone is shown in  
281 semi-transparent gray and the fitted MRI-based template brain in red.

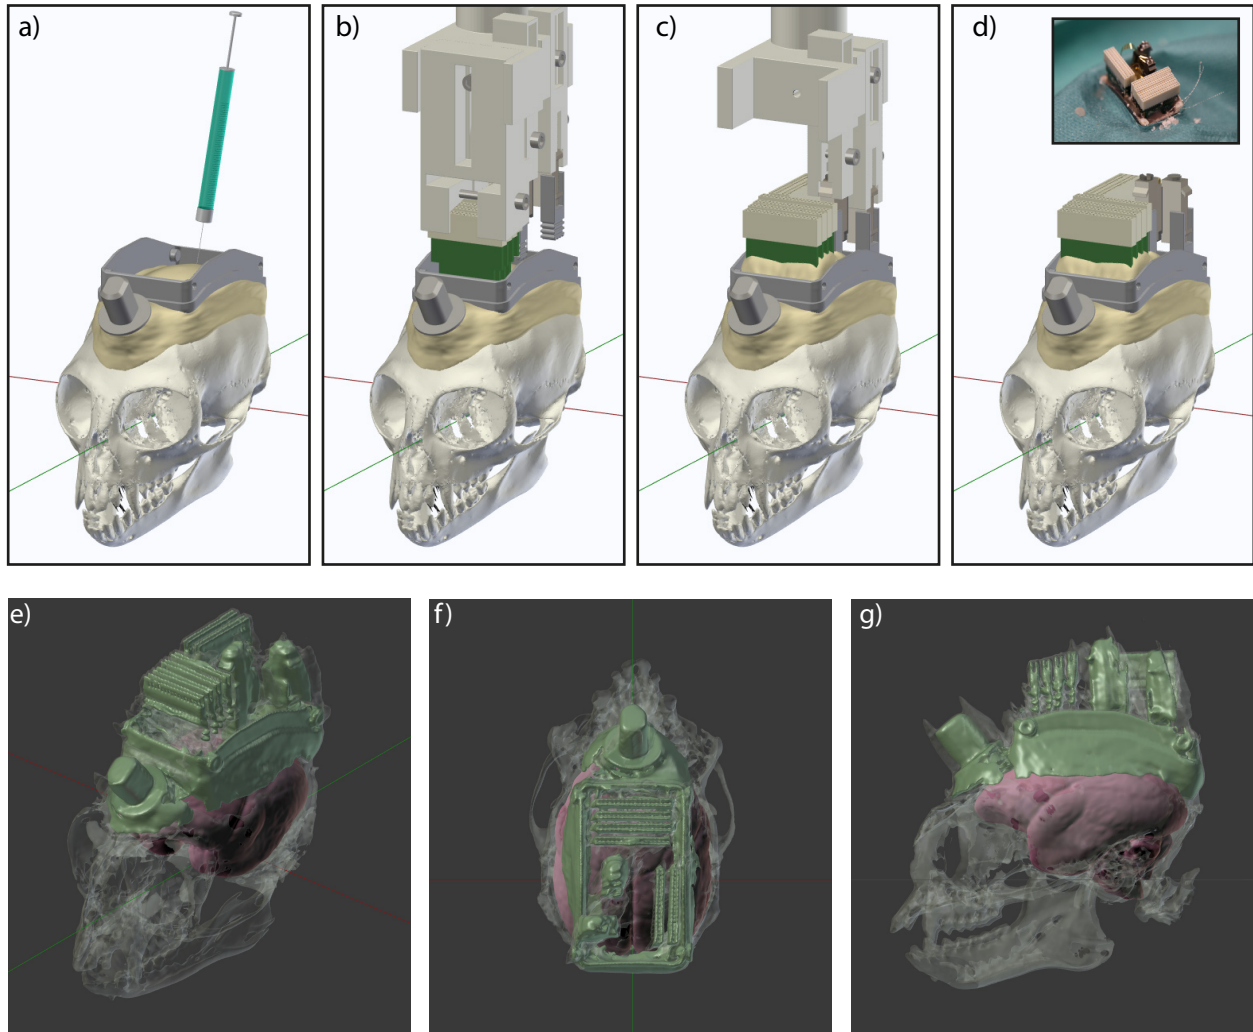

282

283 **Figure 4 | Surgery 2: Injection of the viral vector and implantation of silicon probes.** a) After stereotaxic alignment  
284 of the skull via the implantation holder and the chamber, a viral vector was injected into area V6. b) A custom  
285 implantation holder, carrying connector PCBs, electrodes and microdrives was lowered into the chamber. c) First, the  
286 connector PCBs were cemented in place and the respective part of the holder was removed to ensure better access  
287 and visibility. Electrodes were then lowered sequentially into the two brain areas, and the respective microdrives were  
288 cemented into position. d) After all parts were secured, the holder was completely removed. Inset shows photograph  
289 at the end of the second surgery. e) Near-isometric projection, f) top view and g) side view of the 3D segmentation from  
290 a CT scan after the second surgery in Monkey A. Radio-opaque cement and metal parts (including connectors and  
291 microdrives) show the highest contrast and are colored in green. Bone is shown in semi-transparent gray. The fitted  
292 MRI-based template brain is shown in red.



## 293 Simultaneous recording in areas V1 and V6

294 After slowly lowering the probes into the brain, clear spiking activity was visible across several  
295 recording sites in areas V1 and V6 (Fig 5a).

296 In order to test visual responsiveness and spatial selectivity, we performed receptive field (RF)  
297 mapping with multi-unit-activity (MUA). Flashing annulus and wedge stimuli were presented while  
298 the animal was maintaining its gaze on a central fixation point. Reverse correlation analysis was  
299 used to locate RF centers across the whole monitor. A detailed account of the RF mapping  
300 procedure can be found in Jendritza et al., 2021. As expected from the implantation target  
301 position, RFs in area V1 were located in the lower right visual field (Fig. 5b). Furthermore, RFs  
302 showed substantial overlap for all electrodes along a given probe shank (Fig. 5b, black outlines  
303 at bottom).

304 Next, we presented static square-wave gratings to the animals. MUA following visual stimulation  
305 with gratings was visible across several recording sites and peaked shortly after stimulus onset  
306 (Fig. 5c, d). Channels were considered to contain visually modulated MUA if they fulfilled both of  
307 the following criteria: (1) The absolute magnitude of trial-averaged MUA exceeded the value of 3  
308 STDs over the baseline ( $|z\text{-score}| > 3$ ) and (2) the distribution of MUA values were significantly  
309 different between baseline and stimulus period ( $p < 0.05$ , Kolmogorov Smirnov test). Figure 5d  
310 illustrates the MUA averaged over all modulated sites from an example shank in V1 ( $n = 31$  out  
311 of 32 sites). Similarly to area V1, many sites in area V6 also showed a significant spatially  
312 selective modulation (Fig 5e) ( $n = 20$  out of 32 sites). RFs along the shank mostly overlapped,  
313 and many sites exhibited a significant MUA response after visual stimulation with gratings  
314 (Fig. 5f, g;  $n = 27$  out of 32 sites).

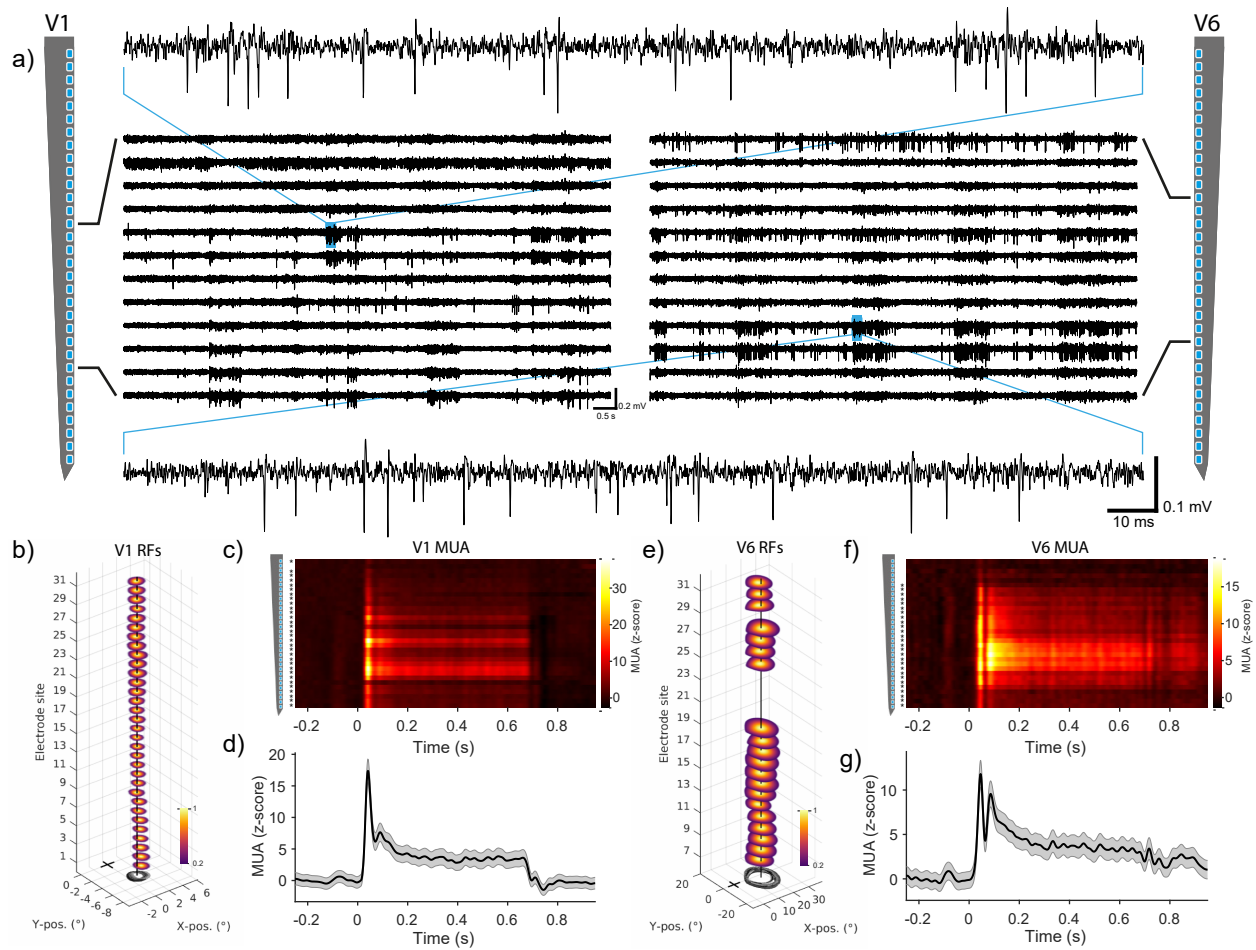

315

316 **Figure 5 | Neural recordings in areas V1 and V6.** a) Band-pass filtered signal (0.3-6 kHz) from example recording

317 sites across one shank in area V1 (left) and area V6 (right). Top and bottom traces show magnified view of the

318 respective example signals in V1 and V6. b) Receptive field (RF) locations calculated from the normalized multi-unit-

319 activity (MUA) of all significantly modulated sites along the example shank (n = 32 out of 32 sites). Outlines of RFs are

320 shown at the bottom in black to gray lines from most superficial to the deepest channel. The vertical black line indicates

321 the median RF location across all sites. The black cross marks the position of the fixation point at the center of the

322 monitor. c) Trial-averaged MUA along the example shank around the time of visual stimulation with gratings. Asterisks

323 on the left indicate significant modulation between pre-stimulation baseline (-0.25 to 0 s) and post-stimulus time (0 to

324 0.65 s) ( $p < 0.05$ ; Kolmogorov Smirnov test for channels with  $MUA > 3\sigma$ ). d) Average MUA  $\pm$  SEM across all significantly

325 modulated sites from the example V1 shank (n = 31 out of 32 sites). e-g) Same as b-d but for example shank in area

326 V6 (n = 20 out of 32 sites were modulated during RF mapping; n = 27 out of 32 sites were modulated during visual

327 stimulation with gratings). MUA was smoothed with a Gaussian window ( $\sigma = 8$ ms). Note different axis scaling between

328 panel b and e. Data for RF mapping and visual stimulation with gratings were recorded in separate sessions in

329 Monkey A.

### 330 **Single unit responses**

331 Having established the overall responsiveness and visual selectivity of MUA, we next sorted  
332 spiking data into single units. Spike sorting was performed semi-automatically with the “Kilosort”  
333 algorithm (Pachitariu et al., 2016). Figure 6 depicts, in the left panel of each column, the average  
334 waveform across all 32 channels of the relevant electrode shank. Due to the fine inter-electrode  
335 spacing (25  $\mu\text{m}$ ), spike waveforms of each identified neuron were detectable as a spatial (and  
336 temporal) pattern across multiple sites. Raster plots and corresponding peristimulus time  
337 histograms (PSTHs) around the time of visual stimulation (black bar on top, 0.65 s duration) can  
338 be seen in the first and second row of Figure 6. The inset in the second row shows orientation  
339 tuning curves calculated from the average spiking activity during the stimulus period (0-0.65 s).  
340 Peak-normalized auto-correlograms for all spikes during the recording session are shown in the  
341 third row. The bottom row shows each unit’s firing rate over the course of a recording session,  
342 documenting that all units were stable throughout the session.

343 The observed single units exhibited different response characteristics, as expected from neural  
344 recordings in visual cortex. Examples in Figure 6 were selected in order to depict the variety of  
345 response profiles present in the data. The units in Fig. 6a and b were recorded in area V1. Unit  
346 a) was strongly visually driven, showed a sharp peak after stimulus onset and exhibited clear  
347 orientation tuning, reminiscent of the principal cells in V1 of the anesthetized marmoset (Yu and  
348 Rosa, 2014). The unit in Fig. 6b was suppressed during the time of visual stimulation, had a  
349 relatively high baseline firing rate, and was orientation tuned. Unit c) and d) are examples  
350 recorded in area V6. Unit c) showed a sustained activation and orientation tuning, similar to  
351 previous reports in V6 (Lui et al., 2006). In contrast, unit d) responded only transiently and  
352 exhibited only weak orientation tuning, potentially due to a non-optimal spatial frequency of the  
353 visual stimulus.

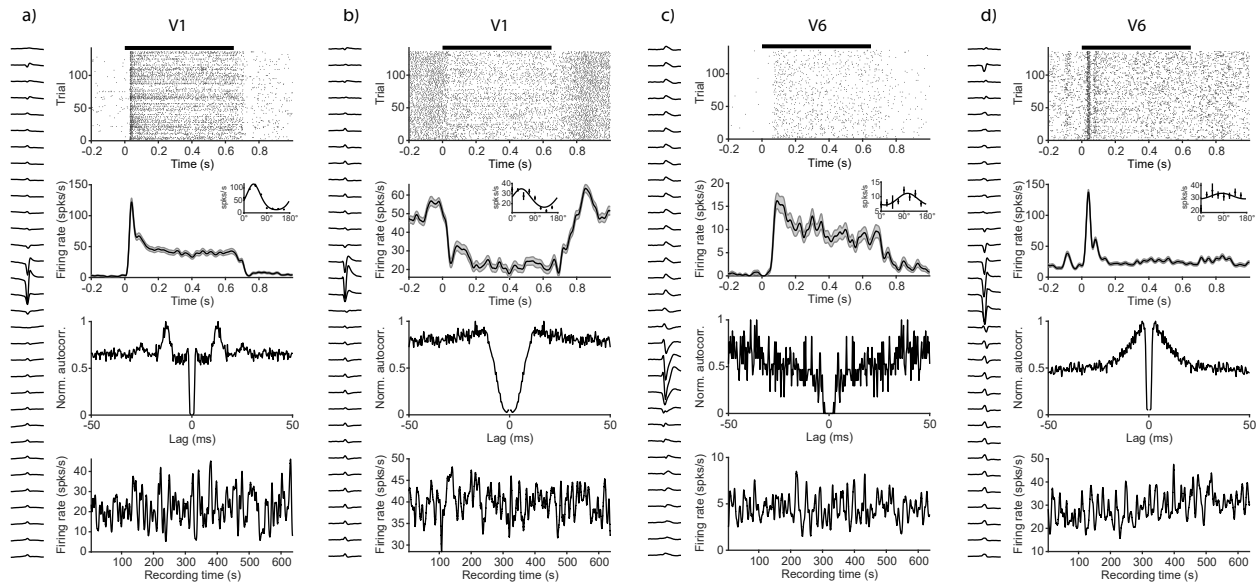

354

355 **Figure 6 | Single unit examples from areas V1 and V6.** Examples of four visually modulated single units (a-d). The  
356 left side of each column shows the mean waveform across all 32 recordings sites of the electrode shank on which the  
357 largest absolute amplitude was detected. Top row: Spiking raster plot around the time of visual stimulation. Black bar  
358 on top indicates stimulus duration (0.65 s). Second row: trial averaged and smoothed (Gaussian window,  $\sigma = 10$  ms)  
359 peristimulus time histogram (PSTH). Inset shows orientation tuning curves calculated from the mean activity during the  
360 stimulus period (0-0.65 s). Error bars and shaded area indicate SEM. Third row: peak-normalized auto-correlogram for  
361 all spikes across the recording. Bottom row: Smoothed firing rate (Gaussian window,  $\sigma = 2$  s) across the entire session,  
362 indicating stability of the recordings. All examples from one recording session in Monkey A.

### 363 Optogenetic stimulation of area V6

364 Optogenetics has become an essential tool in systems neuroscience (Deisseroth, 2015). To  
365 demonstrate that our recording approach is compatible with optogenetic stimulation techniques,  
366 we injected an adeno-associated viral vector (AAV), expressing the fast channelrhodopsin variant  
367 'Chronos' (Klapoetke et al., 2014) under control of the CamKII $\alpha$  promotor into area V6. Expression  
368 under the CamKII $\alpha$  promotor is almost exclusively restricted to excitatory neurons (Gerits et al.,  
369 2015; Han et al., 2009; Watakabe et al., 2015). After several weeks of expression, we placed an  
370 optic fiber above the V6 craniotomy to stimulate neurons underneath the transparent silicone gel

371 (Fig. 1c). The optic fiber was coupled to a laser that could be directly modulated with arbitrary  
372 waveforms. Stimulation was performed with sinusoidal waveforms at a peak amplitude of 25 mW.  
373 One example trial in which stimulation was performed with an 80 Hz sinusoidal waveform is  
374 depicted in Fig. 7a. Optogenetically-induced spiking was visible across several channels.  
375 Analysis of the trial-averaged MUA revealed clear optogenetic activation time-locked to the laser  
376 waveform, for all 32 channels along the example shank (Fig. 7b). The z-scored MUA averaged  
377 across all trials and all modulated channels is presented in Fig 7c ( $p < 0.05$ , Kolmogorov Smirnov  
378 test for channels with  $MUA > 3\sigma$ ,  $n = 32$  out of 32 channels).

379 In order to exclude potential contamination from light-induced artifacts, we took several  
380 precautions and applied appropriate controls: First, the silicon probes used in this study are  
381 relatively robust against light artifacts (Chen et al., 2021). Furthermore, we avoided fast transients  
382 in light intensity by stimulating with low-frequency sine waves that do not contain energy in the  
383 spike frequency range. Data for MUA and SUA analysis in which optogenetic stimulation was  
384 performed, were high-pass filtered with a sharp frequency cutoff (Chebyshev Type II filter) and  
385 strong stop-band attenuation (200 dB) to remove any potential contamination from the low  
386 frequency laser signal (Wu et al., 2015). Additionally, we included a control condition, in which  
387 light with a wavelength of 594 nm with matched output power was used for optical stimulation.  
388 The opsin variant used in this study should not be activated by this wavelength (Klapoetke et al.,  
389 2014). These controls ruled out that the observed neural activation was caused by light artifacts  
390 or other non-specific effects such as heating.

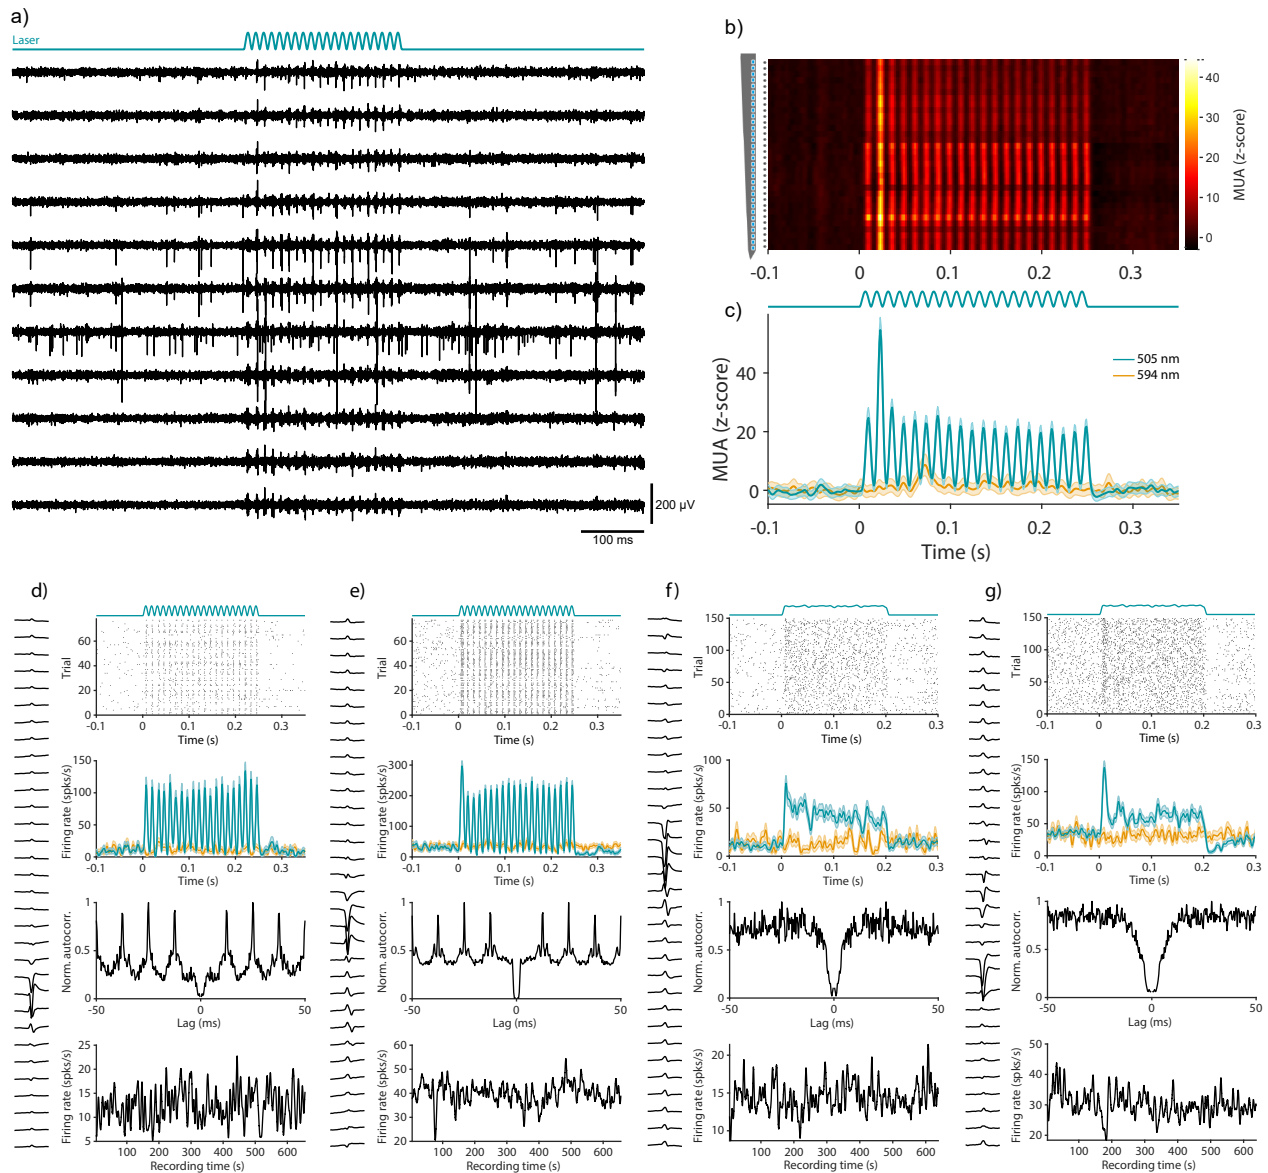

391

392 **Figure 7 | Optogenetic activation of neurons in the awake marmoset. a)** Example traces of band-pass filtered data

393 during optogenetic stimulation with an 80 Hz sinusoidal pattern of 250 ms duration (25 mW peak). b) Trial averaged, z-

394 scored MUA of all recordings sites from an example shank for the 505 nm stimulation condition. Asterisks on the left

395 indicate significant modulation between pre-stimulation baseline (-0.25 to 0 s) and stimulus time (0 to 0.25 s) across all

396 conditions ( $p < 0.05$ , Kolmogorov Smirnov test for channels with  $MUA > 3\sigma$ ) c) Average MUA across all significantly

397 modulated channels ( $n = 32$  out of 32 channels), for stimulation with 505 nm and 594 nm, respectively as indicated by

398 the color legend. d-g) Four examples of optogenetically modulated single units: d) and e) from Monkey A, f) and g) from

399 Monkey D. The left side of each column shows the mean waveform across all 32 recordings sites of the relevant

400 electrode shank. Top row: raster plot of spikes around the time of stimulation with 505 nm. Average laser waveform

401 across all trials is shown on top. Second row: trial averaged and smoothed (Gaussian window,  $\sigma = 2$  ms) peristimulus

402 time histogram (PSTH) for stimulation conditions with 505 nm and 594 nm (same color code as in c). Third row: peak-  
403 normalized auto-correlogram for all detected spikes during the recording session. Note the clear optogenetically  
404 induced rhythmicity in the autocorrelations of neurons in d) and e). Bottom row: Smoothed firing rate (Gaussian window,  
405  $\sigma = 2$  s) across the entire session, indicating stability of the recordings.

406 Next, we spike sorted the data as described earlier in order to identify optogenetically modulated  
407 single units. Four example units are depicted in Figure 7 d-g (figure conventions are as in Figure  
408 6). Figures 7d and e show examples from Monkey A, in which optogenetic stimulation was  
409 performed with an 80 Hz sinusoidal pattern. On each trial, sinusoidal waveforms started smoothly  
410 at the trough from an intensity of 0 mW with a peak amplitude of 25 mW. Single unit spikes were  
411 precisely time locked to the laser stimulation (Fig 7d, e). Consistent with the trial-averaged  
412 optogenetic responses, the resulting autocorrelation analysis of SUA showed a prominent peak  
413 at the reciprocal of the stimulation frequency ( $1/80$  Hz = 12.5 ms). Figure 7f and g are additional  
414 examples from Monkey D, in which optogenetic stimulation was performed with sine waves of  
415 different frequencies (0, 10, 20, 30, 40, 50, 60, 70, 80 Hz) and randomized phases. To avoid  
416 artifacts from sharp transients in light intensity, onset and offset of the stimulation waveform were  
417 smoothed (see Materials and Methods for details). The resulting average laser intensity across  
418 all trials is shown on top of the raster plot. In both monkeys, spiking activity of single units was  
419 not affected by the control stimulation (yellow trace in second row, 594 nm), and the rates  
420 remained relatively stable throughout the recording session (Fig.7, lowermost row).

421 These results show that we successfully combined semi-chronic recordings in two areas with  
422 optogenetic stimulation of neurons in the visual cortex of the awake marmoset.



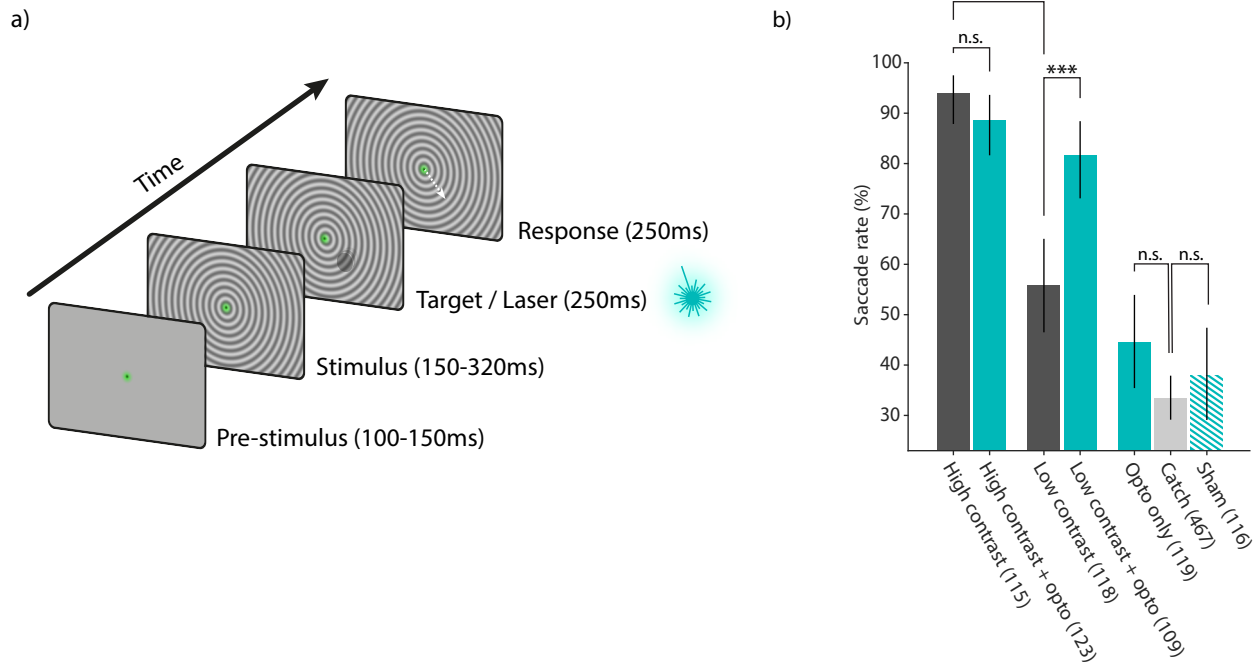

423

424 **Figure 8 | Visual and optogenetic detection task and behavioral results.** a) Schematic illustration of the detection

425 task. After a brief pre-stimulus fixation period, a background stimulus was shown, followed by the onset of a small visual

426 target with either high or low contrast. On 50% of these trials, the visual target was paired with optogenetic stimulation.

427 Additionally, trials without visual target were included, either with effective laser stimulation ('Opto only' condition) or

428 with control laser stimulation, in which the optic fiber was placed outside the craniotomy ('Sham' condition), or with no

429 laser stimulation ('Catch'). All trial conditions except catch trials had identical timing and were rewarded if the monkey

430 executed a saccade 50-500 ms after target or laser onset. b) Saccade rates for all task conditions. The animal showed

431 increased detection performance (higher saccade rate) for high-contrast visual targets compared to low contrast targets

432 (93.9% vs. 55.9%, Chi-squared test;  $p=3.64e-10$ ). Pairing high-contrast visual targets with optogenetic stimulation did

433 not result in a difference in saccade rate (Chi-squared test;  $p=0.283$ ). Saccade rate increased significantly when low

434 contrast targets were paired with optogenetic stimulation (55.9% vs. 81.7%; Chi-squared test;  $p=1.47e-04$ ). Optogenetic

435 stimulation alone was not sufficient to be detected by the animal when compared to the false alarm rate (44.5% vs.

436 33.4%; Chi-squared test;  $p=0.0521$ ). The saccade rate in the sham stimulation control condition (laser fiber positioned

437 2 mm outside the craniotomy) was not different from the false alarm rate (37.9% vs. 33.4%; Chi-squared test;  $p=0.419$ ).

438 Number of trials are shown in parenthesis. Error bars indicate 95% confidence intervals.

## 439 Behavioral report of optogenetic stimulation

440 In order to test whether activation of excitatory neurons in area V6 could be behaviorally reported,  
441 we trained one animal (Monkey A) in a visual and optogenetic detection task (Fig.8a). The animal  
442 was required to briefly maintain fixation (100-150 ms) on a central fixation point. After this period,  
443 a background stimulus (full screen circular grating) was presented. After an additional 150-320  
444 ms, a moving visual target with either low or high contrast was presented for 250 ms. Half of these  
445 trials were randomly paired with optogenetic stimulation (250 ms square pulse, 25 mW amplitude,  
446 same onset time as visual stimulus, see Materials and Methods for details). An additional  
447 condition was included in which optogenetic stimulation was performed in the absence of a visual  
448 target. The monkey was rewarded for making a saccade away from the fixation point within 500  
449 ms from the onset time of visual and/or optogenetic stimulation. To prevent false alarms, 40% of  
450 all trials were 'catch trials', in which neither an optogenetic nor a visual target appeared. In these  
451 trials, the monkey was rewarded for maintaining fixation until the end of the trial. As control, we  
452 randomly interleaved trials with a sham stimulation condition. Sham stimulation was identical to  
453 real optogenetic stimulation (without a visual target), but the laser output was switched to a second  
454 optic fiber that was placed 2 mm outside the craniotomy. Importantly, sham trials were rewarded  
455 identical to real trials, such that the monkey would be able to benefit from any cues unspecific to  
456 the optogenetic stimulation.

457 High-contrast visual targets were correctly reported in 93.9% of trials, compared to only 55.9% in  
458 the low-contrast target condition (Chi-squared test;  $p=3.64e-10$ ;  $n=115$  high-contrast and  $n=123$   
459 low contrast trials). Pairing the high-contrast visual target with optogenetic stimulation did not  
460 significantly affect detection performance (Chi-squared test;  $p=0.283$ ;  $n=115$  high-contrast and  
461  $n=123$  high-contrast + opto trials). A different pattern was observed for low-contrast visual targets:  
462 Pairing the visual stimulus with optogenetic stimulation caused performance to improve from  
463 55.9% to 81.7% (Chi-squared test;  $p=1.47e-04$ ;  $n=118$  low-contrast and  $n=109$  low-

464 contrast + opto trials). The observed increase in saccade rate indicates that the monkey was able  
465 to integrate neuronal signals from both, optogenetic and visual sources, in order to improve  
466 detection performance. The response rate to catch trials, i.e. the 'false alarm rate' was low  
467 (33.4%). Interestingly, optogenetic stimulation alone was not sufficient to induce a saccadic  
468 response that was significantly different from the false alarm rate (Chi-squared test;  $p=0.0521$ ;  
469  $n=119$  opto only and  $n=467$  catch trials). Importantly, the saccade rate in the sham control  
470 condition was not different from the false alarm rate (Chi-squared test;  $p=0.419$ ;  $n=116$  sham and  
471  $n=467$  catch trials).

472 These results show how our approach can be used to study signal integration from optogenetic  
473 stimulation during perception in the visual cortex of awake behaving marmosets.

## 474 Discussion

475 Here, we demonstrate for the first time neural recordings and optogenetic stimulation in  
476 combination with behavioral manipulation in the awake behaving marmoset. Systems  
477 neuroscience relies on the constant improvement of technologies for recording and manipulation  
478 of neural circuits in vivo. Novel techniques, such as next-generation electrode technology, are  
479 therefore being developed at a rapid pace (Steinmetz et al., 2018; Hong and Lieber, 2019).  
480 Moreover, some efforts for technology development in neuroscience explicitly rely on the  
481 advantages of the marmoset model (Okano et al., 2016). Motivated by these factors, we  
482 implemented a novel approach that enables the use of modern neural probes in combination with  
483 optogenetic stimulation and behavioral manipulation in the awake, behaving marmoset. We  
484 demonstrate the functionality of our methods by obtaining multi- and single-unit recordings in two  
485 visual areas simultaneously and using optogenetic stimulation to drive neural activity and  
486 influence the animal's behavior in a detection task.

### 487 Advantages, drawbacks and further directions of the 3D printing-based 488 design

489 Our design relies heavily on the use of 3D printing technology. 3D printing allows for rapid design  
490 adaptations, requires few mechanical constraints and enables the production of prototypes at low  
491 cost and short turnover times (Randazzo et al., 2016; Chen et al., 2017). These factors make it  
492 possible for other researchers to easily modify and improve the design presented here. There are  
493 several potential adaptations that could be useful, for example: expansion of the chamber and  
494 change in its position relative to the skull. Such modifications could enable recordings from more  
495 lateral brain areas such as area MT or IT, which are inaccessible with the current design (Suppl.  
496 Fig. 1). Moreover, the design could be adapted such that it integrates a mechanism for head

497 fixation on the chamber (Ding et al., 2017; Johnston et al., 2018). This would make a separate  
498 headpost obsolete and thereby allow better access to frontal regions. Also, the integration of a  
499 head-fixation mechanism on the chamber might further enhance mechanical stability, which could  
500 facilitate the use with imaging techniques.

501 One important drawback of 3D printing methods (specifically sintering methods as used here) is  
502 that the untreated surface finish is rough. Therefore, additional steps are required if a high-  
503 precision fit (e.g. for headpost or screw threads) or a watertight sealing is necessary (Chen et al.,  
504 2017).

505 The weight of the complete implant, allowing recordings from 192 electrodes, amounted to  
506 approximately 8g (Fig 2c). The titanium chamber alone weighs only 1.5g and is designed to  
507 smoothly fit onto the surface of the skull with a low profile, thereby minimizing any unnecessary  
508 volume (Fig. 1a, b and 2a, b). The achieved weight minimization and the mechanical robustness  
509 of 3D printed titanium makes our design compatible with wireless recording technology. Data-  
510 loggers with batteries or wireless transmitters might be utilized, while remaining at an acceptable  
511 weight (Eliades and Wang, 2008; Roy and Wang, 2012; Walker et al., 2021). Importantly, the size  
512 and weight of implants in head-unrestrained marmosets should remain as light as possible given  
513 that these animals can perform extremely fast head movements (Pandey et al., 2020).

## 514 **Semi-chronic vs. chronic and acute recordings**

515 Semi-chronic recording approaches, as presented here, do not require repeated insertions of  
516 electrodes into the brain for each recording session. Thus, just like chronic recordings, they can  
517 shorten the experimental preparation time and reduce the risk of infections. At the same time,  
518 such an approach retains the option of moving probes deeper into the brain after signal decay or  
519 in case the recording depth needs to be adjusted. The possibility to adapt recording depth is  
520 especially important for target locations in deeper brain structures. Thus, semi-chronic recordings

521 with silicon probes have been recently successfully used to record neural activity from the  
522 brainstem of awake marmosets (Pomberger and Hage, 2019).

523 Yet, there are also advantages to other approaches such as chronic or acute recordings. In small  
524 animals, e.g. mice, immobile, chronically implanted silicon probes can provide neural recording  
525 stability over long periods of time (Okun et al., 2016; Juavinett et al., 2019; Steinmetz et al., 2021).  
526 Stability is likely related to the relative absence of movement of the mouse brain inside its skull.  
527 In marmosets, recent work has shown good recording stability with chronically implanted floating  
528 electrode ('Utah') arrays (Walker et al., 2021). However, long term recording stability with  
529 immobile silicon probes remains to be demonstrated. Furthermore, chronically implanted  
530 electrode arrays, such as the 'Utah' array do not require any movable parts and can therefore be  
531 completely sealed off after implantation, minimizing the risk of infections after surgery (Davis et  
532 al., 2020; Walker et al., 2021). Acute recording approaches on the other hand allow for repeated  
533 independent measurements and can therefore result in higher single-unit yield and make it  
534 possible to quickly change recording position (Sedaghat-Nejad et al., 2019). Thus, while semi-  
535 chronic recordings are advantageous in many circumstances, the individual experimental  
536 requirements should be considered when evaluating different recording approaches.

537 In this work, we performed semi-chronic recordings with silicon probe technology from passive  
538 electrodes. Yet, our design is compatible with active probes such as Neuropixels (Jun et al., 2017;  
539 Steinmetz et al., 2021) in chronic (Juavinett et al., 2019; Steinmetz et al., 2021) or semi-chronic  
540 (Vöröslakos et al., 2021) configuration. Currently, electrode shanks and microdrive-mountable  
541 components of passive silicone probes as used in this work are still smaller than those of  
542 Neuropixels probes (shank width: 25-50  $\mu\text{m}$  vs. 70  $\mu\text{m}$  for Neuropixels; shank thickness: 15 $\mu\text{m}$  vs  
543 20 $\mu\text{m}$  for Neuropixels). However, active probes with fully integrated electronics and miniaturized  
544 head stages would allow for even higher channel-count recordings and will be an important next  
545 step for the advancement of neural recordings in awake marmosets.

## 546 Optogenetic manipulation of detection behavior

547 We demonstrated the utility of our design by behavioral manipulation via optogenetic stimulation  
548 of area V6 in the context of a detection task. Previous work in macaques has demonstrated that  
549 optogenetic stimulation of the primary visual cortex can be readily reported via saccades (Jazayeri  
550 et al., 2012; Ju et al., 2018). These findings are consistent with the view that animals perceived  
551 phosphenes that were induced by optogenetic excitation of neurons in V1. In contrast, our own  
552 results from area V6 indicate that optogenetic stimulation alone was not sufficient to significantly  
553 modulate saccade rates. However, a clear behavioral effect was observed when laser stimulation  
554 was paired with a low contrast visual stimulus. It is known from microstimulation experiments in  
555 macaque V1 that detection sensitivity can substantially increase with behavioral training (Ni and  
556 Maunsell, 2010). Furthermore, the detection of microstimulation outside of primary sensory areas  
557 can require extended training (Histed et al., 2013). Similar changes in sensitivity thresholds have  
558 been reported for optogenetic stimulation in the somatosensory cortex (May et al., 2014).  
559 Therefore, it is plausible that further behavioral training in the marmoset would also lead to a  
560 report of optogenetic stimulation alone. This aspect should be investigated in future work.

561



## 562 Materials and Methods

563 All animal experiments were approved by the responsible government office  
564 (Regierungspräsidium Darmstadt) in accordance with the German law for the protection of  
565 animals and the “European Union’s Directive 2010/63/EU”.

### 566 Animals

567 Five adult male marmosets were implanted with chamber, headpost and reference wires. Three  
568 of these animals were subsequently injected with a viral vector in area V6, and implanted with  
569 electrodes in areas V1 and V6. The decision to use male animals was due to availability and was  
570 not part of the experimental design. Table 1 lists relevant details, procedures and outcomes for  
571 each animal.

572 **Table 1: List of all animals, procedures and outcomes:**

|                                                         | <b>Monkey A</b>                                | <b>Monkey U</b> | <b>Monkey D</b> | <b>Monkey E</b> | <b>Monkey P</b> |
|---------------------------------------------------------|------------------------------------------------|-----------------|-----------------|-----------------|-----------------|
| Sex                                                     | male                                           | male            | male            | male            | male            |
| First surgery performed (head-post, chamber, ref. wire) | yes                                            | yes             | yes             | yes             | yes             |
| Body weight at first surgery                            | 385g                                           | 438g            | 455g            | 530g            | 428g            |
| Second surgery performed (electrodes, viral vector)     | yes                                            | yes             | yes             | no              | no              |
| Body weight at second surgery                           | 371g                                           | 460g            | 445g            | n.a.            | n.a.            |
| Neural recordings in V1                                 | yes                                            | yes             | yes             | n.a.            | n.a.            |
| Neural recordings in V6                                 | yes                                            | poor            | yes             | n.a.            | n.a.            |
| Optogenetic stimulation in V6                           | yes                                            | poor            | yes             | n.a.            | n.a.            |
| Duration (months) after first surgery*                  | 40                                             | 26              | 26              | 26              | 26              |
| Duration (months) after second surgery*                 | 35                                             | 19              | 19              | n.a.            | n.a.            |
| Data shown in figures                                   | Fig.1, Fig.4,<br>Fig.5, Fig.6,<br>Fig.7, Fig.8 | -               | Fig.3, Fig.7    | -               | -               |

573 \*Relative to the time this manuscript was prepared (September 2021)

## 574 Stimulus presentation

575 Stimulus presentation was controlled by the custom-developed ARCADE toolbox  
576 (<https://github.com/esi-neuroscience/ARCADE>), based on MATLAB (Mathworks, USA) and C++.  
577 Stimuli were displayed on a TFT monitor (Samsung SyncMaster 2233RZ) at a refresh rate of  
578 120 Hz. Animals were placed at a distance of 45 cm to the monitor in a dimly lit recording booth.  
579 A photodiode was placed in the top left corner of the monitor in order to determine exact stimulus-  
580 onset times.

## 581 Eye tracking

582 The left eye of the animals was tracked under external infrared light illumination with a sampling  
583 rate of 1 kHz (Eyelink 1000, SR research, Canada). A 25 mm/F1.4 lens was used at a distance  
584 of 28 cm to the animal's eye.

## 585 Implant design and 3D printing

586 Designs were developed in Blender ([www.blender.org](http://www.blender.org)), OnShape (<https://www.onshape.com/>),  
587 and Solidworks (<https://www.solidworks.com/>). 3D renderings were generated in Blender. The  
588 skull template shown in Figures 1 and 2 was segmented with 3D Slicer (<https://www.slicer.org/>)  
589 based on high-resolution CT data from a marmoset skull archived on the MorphoSource data  
590 base (<https://doi.org/10.17602/M2/M5203/>). Chambers and microdrive stabilizers were printed via  
591 direct metal laser sintering from grade 5 (Ti6Al4V) titanium (Materialise, Belgium). Microdrives  
592 were glued to the stabilizers with cyanoacrylate glue. Lids were printed via selective laser sintering  
593 from PA12 nylon (Shapeways, USA). To ensure watertight sealing, a thin layer of silicone (Kwik-  
594 Sil, World Precision Instruments, USA) was applied to the small ridge inside the lid that served as  
595 contact area between chamber and lid. All custom implantation holders and guides were printed  
596 from standard resins via stereolithography on a "Form 1" printer (Formlabs Inc., USA). Design  
597 files for 3D printing can be found at <https://github.com/PJendritza/Marmo/>.

## 598 Anesthesia

599 Anesthesia for all surgeries was induced with an intramuscular (i.m.) injection of a mixture of  
600 alfaxalone (8.75 mg/kg) and diazepam (0.625 mg/kg). Tramadol (1.5 mg/kg) and metamizol (80  
601 mg/kg) were injected i.m. for initial analgesic coverage. Subsequently, a continuous intravenous  
602 (i.v.) infusion was provided through the lateral tail vein. The i.v. mixture contained glucose, amino  
603 acids (Aminomix 1 Novum, Fresenius Kabi, Germany), dexamethasone (0.2-0.4 mg·kg<sup>-1</sup>·h<sup>-1</sup>),  
604 tramadol (0.5-1.0 mg·kg<sup>-1</sup>·h<sup>-1</sup>) and metamizol (20-40 mg·kg<sup>-1</sup>·h<sup>-1</sup>). The maximal infusion rate  
605 was 5 ml·kg<sup>-1</sup>·h<sup>-1</sup>. Animals were breathing spontaneously throughout the surgery via a custom  
606 3D printed face mask that applied isoflurane (0.5-2% in 100% oxygen). Heart rate, respiration rate  
607 and body temperature were constantly monitored (Model 1030 Monitoring Gating System, SALL,  
608 USA).

## 609 Implantation of chamber and headpost

610 After placing the animal in a stereotaxic apparatus for the first surgery, an incision was made on  
611 the dorsal part of the skull. The temporal muscle was slightly retracted (<5 mm from the superior  
612 temporal lines) and all soft tissue was completely removed from the bone surface. The bone was  
613 first cleaned by mechanical abrasion, then scrubbed with 5% H<sub>2</sub>O<sub>2</sub> and rinsed with saline. For an  
614 optimal bonding between cement and bone, the skull surface was roughened with a metal brush,  
615 and any remaining dust was removed. After the bone was completely clean and dry, we applied  
616 a thin layer of light-curable dental adhesive (All-Bond Universal, BISCO). After drying and curing  
617 with blue light, we applied a thin layer (<1 mm) of dental cement on top of the adhesive. Once the  
618 cement was cured, a small bur hole was drilled just anterior of the chamber. Two platinum wires  
619 (PT-5T, Science Products) were implanted epidurally at this location and served as backup  
620 reference wires for the recordings (the actual reference wires were later implanted subdurally in  
621 the second surgery).

## 622 Injection of the viral vector

623 Viral vectors (AAV1.CamKIIa.Chronos-eYFP-WPRE) were injected with a microinjector pump  
624 (UMP3-1, World Precision Instruments), holding a 10uL microsyringe (NanoFil syringe, World  
625 Precision Instruments) to which a 35G injection needle was attached. A durotomy of approx.  
626 1.5 mm was performed with a bent 25G cannula, and the vector was injected at two depths  
627 (-1.4 mm and -0.5 mm from the surface). A volume of 2.5  $\mu$ l at each depth was injected at a speed  
628 of 200 nL/min (total injected volume = 5.0  $\mu$ l). To ensure sufficient diffusion of the viral vector, we  
629 waited 10 min after the each injection before moving or retracting the needle.

## 630 Silicon probes

631 Silicon probes were semi-chronically implanted in areas V1 and V6, mounted on one microdrive  
632 per area (Nano-Drive CN-01 V1, Cambridge NeuroTech, UK). Two 32-channel shanks with  
633 250  $\mu$ m spacing were implanted in V1, and four 32-channel shanks in V6 (H2 probe, Cambridge  
634 NeuroTech, UK). Electrode implantation was performed directly following the injection of the viral  
635 vector. Electrode tips were disinfected shortly before the implantation by dipping them twice in  
636 70% ethanol for 45 s. After the electrodes were in place and the cement was hardened,  
637 craniotomies were sealed by applying several drops of soft silicone gel (DOWSIL 3-4680, Dow  
638 Corning).

## 639 Acquisition and processing of neural data

640 Neural signals were recorded through active, unity gain head stages (ZC32, Tucker Davis  
641 Technologies, USA), digitized at 24,414.0625 Hz (PZ2 preamplifier, Tucker Davis Technologies,  
642 USA) and re-sampled offline to 25 kHz. Sample-by-sample re-referencing was applied by  
643 calculating the median across all channels for each shank and subtracting this signal from each  
644 channel of the corresponding shank (Jun et al., 2017). Data was band-pass filtered for spiking  
645 activity either with a 4th-order Butterworth filter (0.3-6 kHz) or, in case optogenetic stimulation

646 was performed, with a 40th-order Chebyshev Type II filter (0.3-8 kHz) with a stop-band  
647 attenuation of 200 dB to exclude any contamination from lower frequencies. For further analysis,  
648 multi-unit activity (MUA) was calculated by full-wave rectification, filtering with a 6th-order low-  
649 pass Chebyshev Type II filter (stopband edge frequency of 500 Hz, stopband attenuation of  
650 50 dB) and down-sampling to 1 kHz.

## 651 Optogenetic stimulation

652 Optogenetic stimulation was performed with a laser beam combiner (LightHUB, Omicron  
653 laserage), housing a 100 mW diode laser with a wavelength of 505 nm (LuxXplus 505-100) with  
654 direct modulation and a 100 mW DPSS laser with a wavelength of 594 nm (OBIS 594-100) with  
655 direct modulation. The combined lasers were coupled to a 50 $\mu$ m/0.22NA optic fiber which was  
656 connected to a fiber optic cannula (200  $\mu$ m core diameter, 0.39 NA, Doric Lenses Inc.). The  
657 cannula was held by a micromanipulator (SM-25C, Narishige) and was positioned approx. 4 mm  
658 above the craniotomy during recording/stimulation sessions. Laser power was calibrated prior to  
659 the experiments with a photodiode-based optical power meter (PM130D, Thorlabs). Output power  
660 was measured at the tip of the fiber optic cannula. Laser waveforms were generated by a real-  
661 time signal processor (RZ2 bioamp processor, Tucker Davis Technologies, USA). To avoid  
662 artifacts arising from sharp transients in laser intensity (Cardin et al., 2010), we only used smooth  
663 on and offsets (Wu et al., 2015). This was done by using one half of a sine wave as a taper at the  
664 beginning and end of any sharp signal (5 ms trough-to-peak time, with the trough having an  
665 intensity of 0 mW).

## 666 CT scans and segmentation

667 CT scans were performed under brief anesthesia induced with an intramuscular (i.m.) injection of  
668 a mixture of alfaxalone (8.75 mg/kg) and diazepam (0.625 mg/kg). The head of the animal was  
669 stabilized via the headpost for the duration of the scan. CTs were performed with a Planmeca

670 ProMax 3D Mid scanner (Planmeca Oy, Finland) at 90 kV and 10 mA with a voxel size of 150  $\mu$ m  
671 (isotropic). Segmentation of CT data was performed with 3D Slicer. Models were exported as STL  
672 files and imported into Blender for alignment.

### 673 Spike sorting and single unit analysis

674 Spike sorting was performed offline with Kilosort (Pachitariu et al., 2016). Average spike  
675 waveforms were calculated from the trimmed mean (5% outlier exclusion). Autocorrelation  
676 functions were generated at a resolution of 0.33 ms and normalized by dividing by the maximum  
677 value after removal of the central peak.

### 678 Receptive field mapping

679 All details about the RF mapping procedure have been described previously in Jendritza et al.,  
680 2021. RF mapping was performed with stimuli consisting of black wedges and annuli of various  
681 orientations and sizes, presented on a gray background for a duration of eight frames (120 Hz  
682 monitor refresh rate). For RF calculation, MUA data was cut into epochs of 280 ms (from 100 ms  
683 before to 180 ms after stimulus onset). Epochs were included in the analysis if the eye position  
684 remained inside the fixation window throughout the epoch. For noise-rejection purposes, we  
685 excluded epochs in which the standard deviation of MUA across time was more than 10-times  
686 larger than the median standard deviation across all epochs. Sites were considered to be  
687 modulated if the mean MUA from at least three different wedge stimuli and at least three different  
688 annulus stimuli evoked a response that was significantly larger (paired t-test,  $\alpha = 0.01$ ) than  
689 the MUA during baseline (100 ms to 0 ms prior to stimulus onset). For plotting, MUA was  
690 normalized per site to have a value between zero and one. RF plots and outlines were generated  
691 by truncating the normalized MUA at a value of 0.2.

## 692 Passive fixation task

693 A passive fixation task was used to measure neural responses following visual stimulation with  
694 gratings. At the beginning of each trial, the animal was required to maintain its gaze at a central  
695 fixation point within a window of  $1.4^\circ$  radius for 100-120 ms. After this period, a static square-  
696 wave grating was presented for 650 ms at a Michelson contrast of 80%. The size and orientation  
697 of the grating was selected at random for each trial. Possible values for the grating radius (in  
698 degrees of visual angle) were:  $5^\circ$ ,  $7.25^\circ$ ,  $9.5^\circ$ ,  $11.75^\circ$  and  $14^\circ$ . Possible values for the grating  
699 orientation were:  $22.5^\circ$ ,  $45^\circ$ ,  $67.5^\circ$ ,  $90^\circ$ ,  $112.5^\circ$ ,  $135^\circ$ ,  $157.5^\circ$  and  $180^\circ$ . After stimulus offset, the  
700 animal was required to maintain its gaze in the fixation window for another 100 ms. After a correct  
701 trial, a picture of a marmoset face was displayed in the center of the monitor, and the animal was  
702 rewarded. The amount of reward was 0.07 ml per trial at the start of the session and increased  
703 by 0.02 ml for every 10 ml consumed (capped at 0.1 ml per trial). Reward was provided via a lick  
704 spout and consisted of diluted *gum arabic*.

## 705 Visual and optogenetic detection task

706 At the beginning of each trial of the detection task, the animal was required to position its gaze at  
707 a central fixation point within a window of  $1.5^\circ$  radius for 100-150ms. After this period, a  
708 background stimulus was presented, while the monkey maintained fixation. The background  
709 stimulus was a full-screen circular grating, concentric to the fixation point and either contracting  
710 towards or expanding from the fixation point, each in a random half of the trials (contrast = 40%,  
711 spatial freq. = 2 cycles/ $^\circ$ , temporal freq. = 1 cycle/s). At 150-320 ms after the onset of the  
712 background stimulus, a black, moving circular patch ( $1.8^\circ$  diameter, moving at  $5.74^\circ$ /s, linear  
713 motion, random direction) with either high (50%) contrast or low contrast (7.8%) was presented  
714 for 250 ms. The center of the movement path of the circular patch was fixed in the lower right  
715 quadrant, where the receptive fields of the optogenetically responsive V6 cells were located.  
716 Additionally, a condition was included in which only optogenetic stimulation was performed in the



717 absence of a visual target. Furthermore, a control “sham” stimulation condition was included, with  
718 sham trials being identical to real optogenetic stimulation trials (without visual target), but with the  
719 laser output switched to a second optic fiber that was placed 2 mm outside the craniotomy. All of  
720 these “go” trials (60% of all trials) were categorized as hits if the animal made a saccade away  
721 from the fixation point within 500 ms after the onset of the moving circular patch or the laser.  
722 Responses that were faster than 50 ms were categorized as early responses and were not  
723 rewarded. 50% of trials with a visible target were coupled with optogenetic stimulation that  
724 consisted of a 250 ms square pulse with an amplitude of 25 mW. The onset timing for visual and  
725 optogenetic stimulation was determined by the computer controlling the visual stimulation. We did  
726 not compensate for any delay between trigger onset and actual onset of the visual stimulus on  
727 the monitor. In the remaining “catch” trials (40% of all trials), no visual or optogenetic target was  
728 presented, and the monkey was rewarded for maintaining its gaze at the fixation point for 800 ms.  
729 After a correct saccade, or a correct rejection (maintained fixation), a picture of a marmoset face  
730 was displayed in the center of the monitor, and the animal was rewarded. The amount of reward  
731 was 0.0625 ml per trial at the start of the session and increased by 0.02 ml for every 10 ml  
732 consumed (capped at 0.1ml per trial).

733 In the detection task described above, catch trials were longer than the average go trial. Thus,  
734 simply calculating saccade rates from catch trials would lead to an overestimation of the true false  
735 alarm rate, because the monkey had more time to perform a saccade in a catch trial than in a go  
736 trial. False-alarm rate calculation was therefore performed in the following way: One randomly  
737 selected catch trial with false alarm was compared with the timing of a randomly selected go-trial.  
738 If the time of the false alarm from the selected catch trial fell within the time window in which the  
739 monkey would have performed a hit, the trial was categorized as a false alarm. If the false alarm  
740 timing was such that the monkey would have missed the target, the trial was categorized as  
741 correct rejection. This random pairing was performed for n=467 random pairs of trials, as this was

742 the expected number of catch trials (40% of all trials), given the total number of hits and misses  
743 performed by the animal (n=700). The proportion of false alarms and the respective binomial  
744 confidence intervals were then calculated for this random sample. This procedure was repeated  
745 1000 times, and the false-alarm rates and confidence intervals from all shuffling iterations were  
746 averaged.

## 747 Acknowledgements

748 We thank Marianne Hartmann for her constant support in training the animals, Martin Vinck for  
749 providing access to his GPU systems and Gustavo Rohenkohl for his feedback on the manuscript.

750 This work was supported by DFG (SPP 1665 FR2557/1-1, FOR 1847 FR2557/2-1, FR2557/5-1-  
751 CORNET, FR2557/6-1-NeuroTMR, FR2557/7-1-DualStreams to P.F.), EU (HEALTH-F2-2008-  
752 200728-BrainSynch, FP7-604102-HBP, FP7-600730-Magnetropes to P.F.), a European Young  
753 Investigator Award to P.F., National Institutes of Health (1U54MH091657-WU-Minn-Consortium-  
754 HCP to P.F.), the LOEWE program (NeFF to P.F.).

## 755 Declaration of interests

756 P.F. has a patent on thin-film electrodes and is beneficiary of a respective license contract with  
757 Blackrock Microsystems LLC (Salt Lake City, UT, USA). P.F. is a member of the Scientific  
758 Technical Advisory Board of CorTec GmbH (Freiburg, Germany) and is managing director of  
759 Brain Science GmbH (Frankfurt am Main, Germany).

## 760 References

- 761 Cardin JA, Carlén M, Meletis K, Knoblich U, Zhang F, Deisseroth K, Tsai LH, Moore CI (2010)  
762 Targeted optogenetic stimulation and recording of neurons in vivo using cell-type-specific  
763 expression of Channelrhodopsin-2. *Nat Protoc*.
- 764 Chen R, Gore F, Nguyen QA, Ramakrishnan C, Patel S, Kim SH, Raffiee M, Kim YS, Hsueh B,  
765 Krook-Magnusson E, Soltesz I, Deisseroth K (2021) Deep brain optogenetics without  
766 intracranial surgery. *Nat Biotechnol*.
- 767 Chen X, Possel JK, Wacongne C, van Ham AF, Klink PC, Roelfsema PR (2017) 3D printing and  
768 modelling of customized implants and surgical guides for non-human primates. *J Neurosci*  
769 *Methods*.
- 770 Courellis HS, Nummela SU, Metke M, Diehl GW, Bussell R, Cauwenberghs G, Miller CT (2019)  
771 Spatial encoding in primate hippocampus during free navigation. *PLoS Biol*.
- 772 Davis ZW, Muller L, Martinez-Trujillo J, Sejnowski T, Reynolds JH (2020) Spontaneous  
773 travelling cortical waves gate perception in behaving primates. *Nature*.
- 774 Deisseroth K (2015) Optogenetics: 10 years of microbial opsins in neuroscience. *Nat Neurosci*.
- 775 Ding R, Liao X, Li J, Zhang J, Wang M, Guang Y, Qin H, Li X, Zhang K, Liang S, Guan J, Lou J,  
776 Jia H, Chen B, Shen H, Chen X (2017) Targeted patching and dendritic Ca<sup>2+</sup> imaging in  
777 nonhuman primate brain in vivo. *Sci Rep*.
- 778 Ebina T, Obara K, Watakabe A, Masamizu Y, Terada SI, Matoba R, Takaji M, Hatanaka N,  
779 Nambu A, Mizukami H, Yamamori T, Matsuzaki M (2019) Arm movements induced by  
780 noninvasive optogenetic stimulation of the motor cortex in the common marmoset. *Proc*  
781 *Natl Acad Sci U S A*.
- 782 Eliades SJ, Wang X (2008) Chronic multi-electrode neural recording in free-roaming monkeys. *J*  
783 *Neurosci Methods*.
- 784 Fenno L, Yizhar O, Deisseroth K (2011) The development and application of optogenetics. *Annu*  
785 *Rev Neurosci*.
- 786 Histed MH, Ni AM, Maunsell JHR (2013) Insights into cortical mechanisms of behavior from  
787 microstimulation experiments. *Prog Neurobiol* 103:115–130.
- 788 Hong G, Lieber CM (2019) Novel electrode technologies for neural recordings. *Nat Rev*  
789 *Neurosci*.
- 790 Jackson N, Muthuswamy J (2008) Artificial dural sealant that allows multiple penetrations of  
791 implantable brain probes. *J Neurosci Methods*.
- 792 Jazayeri M, Lindbloom-Brown Z, Horwitz GD (2012) Saccadic eye movements evoked by  
793 optogenetic activation of primate V1. *Nat Neurosci*.
- 794 Jendritza P, Klein FJ, Rohenkohl G, Fries P (2021) Visual neuroscience methods for  
795 marmosets: Efficient receptive field mapping and head-free eye tracking. *eNeuro*.
- 796 Johnston K, Ma L, Schaeffer L, Everling S (2019) Alpha oscillations modulate preparatory  
797 activity in marmoset area 8Ad. *J Neurosci*.

- 798 Johnston KD, Barker K, Schaeffer L, Schaeffer D, Everling S (2018) Methods for chair restraint  
799 and training of the common marmoset on oculomotor tasks. *J Neurophysiol*.
- 800 Ju N, Jiang R, Macknik SL, Martinez-Conde S, Tang S (2018) Long-term all-optical interrogation  
801 of cortical neurons in awake-behaving nonhuman primates. *PLoS Biol*.
- 802 Juavinett AL, Bekheet G, Churchland AK (2019) Chronically implanted neuropixels probes  
803 enable high-yield recordings in freely moving mice. *Elife*.
- 804 Jun JJ et al. (2017) Fully integrated silicon probes for high-density recording of neural activity.  
805 *Nature*.
- 806 Klapoetke NC et al. (2014) Independent optical excitation of distinct neural populations. *Nat*  
807 *Methods* 11.
- 808 Komatsu M, Sugano E, Tomita H, Fujii N (2017) A chronically implantable bidirectional neural  
809 interface for non-human primates. *Front Neurosci*.
- 810 Kondo T, Saito R, Otaka M, Yoshino-Saito K, Yamanaka A, Yamamori T, Watakabe A,  
811 Mizukami H, Schnitzer MJ, Tanaka KF, Ushiba J, Okano H (2018) Calcium Transient  
812 Dynamics of Neural Ensembles in the Primary Motor Cortex of Naturally Behaving  
813 Monkeys. *Cell Rep*.
- 814 Liu C, Ye FQ, Yen CCC, Newman JD, Glen D, Leopold DA, Silva AC (2018) A digital 3D atlas of  
815 the marmoset brain based on multi-modal MRI. *Neuroimage*.
- 816 Lui LL, Bourne JA, Rosa MGP (2006) Functional response properties of neurons in the  
817 dorsomedial visual area of New World monkeys (*Callithrix jacchus*). *Cereb Cortex* 16:162–  
818 177.
- 819 Macdougall M, Nummela SU, Coop S, Disney A, Mitchell JF, Miller CT (2016) Optogenetic  
820 manipulation of neural circuits in awake marmosets. *J Neurophysiol*.
- 821 May T, Ozden I, Brush B, Borton D, Wagner F, Agha N, Sheinberg DL, Nurmikko A V. (2014)  
822 Detection of optogenetic stimulation in somatosensory cortex by non-human primates -  
823 Towards artificial tactile sensation. *PLoS One*.
- 824 Mehta P, Kreeger L, Wylie DC, Pattadkal JJ, Lusignan T, Davis MJ, Turi GF, Li WK, Whitmire  
825 MP, Chen Y, Kajs BL, Seidemann E, Priebe NJ, Losonczy A, Zemel B V. (2019)  
826 Functional Access to Neuron Subclasses in Rodent and Primate Forebrain. *Cell Rep*.
- 827 Miller CT (2017) Why marmosets? *Dev Neurobiol*.
- 828 Miller CT, Freiwald WA, Leopold DA, Mitchell JF, Silva AC, Wang X (2016) Marmosets: A  
829 Neuroscientific Model of Human Social Behavior. *Neuron* 90:219–233.
- 830 Mitchell JF, Leopold DA (2015) The marmoset monkey as a model for visual neuroscience.  
831 *Neurosci Res*.
- 832 Ni AM, Maunsell JHR (2010) Microstimulation Reveals Limits in Detecting Different Signals from  
833 a Local Cortical Region. *Curr Biol*.
- 834 O'Connor HJ, Dickson AN, Dowling DP (2018) Evaluation of the mechanical performance of  
835 polymer parts fabricated using a production scale multi jet fusion printing process. *Addit*  
836 *Manuf*.
- 837 Okano H (2021) Current Status of and Perspectives on the Application of Marmosets in

- 838 Neurobiology. *Annu Rev Neurosci*.
- 839 Okano H, Sasaki E, Yamamori T, Iriki A, Shimogori T, Yamaguchi Y, Kasai K, Miyawaki A  
840 (2016) Brain/MINDS: A Japanese National Brain Project for Marmoset Neuroscience.  
841 *Neuron*.
- 842 Okun M, Lak A, Carandini M, Harris KD (2016) Long term recordings with immobile silicon  
843 probes in the mouse cortex. *PLoS One*.
- 844 Pachitariu M, Steinmetz N, Kadir S, Carandini M, Kenneth D. H (2016) Kilosort: realtime spike-  
845 sorting for extracellular electrophysiology with hundreds of channels. *bioRxiv*.
- 846 Pandey S, Simhadri S, Zhou Y (2020) Rapid Head Movements in Common Marmoset Monkeys.  
847 *iScience* 23:100837.
- 848 Panzeri S, Macke JH, Gross J, Kayser C (2015) Neural population coding: Combining insights  
849 from microscopic and mass signals. *Trends Cogn Sci*.
- 850 Paxinos G, Watson C, Petrides M, Rosa M, Tokuno H (2012) The marmoset brain in stereotaxic  
851 coordinates. Elsevier Academic Press.
- 852 Poggio T (2011) The computational magic of the ventral stream. *Nat Preced*.
- 853 Pomberger T, Hage SR (2019) Semi-chronic laminar recordings in the brainstem of behaving  
854 marmoset monkeys. *J Neurosci Methods*.
- 855 Porada I, Bondar I, Spatz WB, Krüger J (2000) Rabbit and monkey visual cortex: More than a  
856 year of recording with up to 64 microelectrodes. *J Neurosci Methods*.
- 857 Randazzo M, Pisapia J, Singh N, Thawani J (2016) 3D printing in neurosurgery: A systematic  
858 review. *Surg Neurol Int*.
- 859 Remington ED, Osmanski MS, Wang X (2012) An Operant Conditioning Method for Studying  
860 Auditory Behaviors in Marmoset Monkeys. *PLoS One*.
- 861 Roy S, Wang X (2012) Wireless multi-channel single unit recording in freely moving and  
862 vocalizing primates. *J Neurosci Methods*.
- 863 Sasaki E et al. (2009) Generation of transgenic non-human primates with germline  
864 transmission. *Nature*.
- 865 Sato K, Sasaguri H, Kumita W, Inoue T, Kurotaki Y, Nagata K, Mihira N, Sato K, Sakuma T,  
866 Yamamoto T, Tagami M, Manabe R, Ozaki K, Okazaki Y, Saido TC, Sasaki E (2020) A  
867 non-human primate model of familial Alzheimer's disease. *bioRxiv*.
- 868 Saxena S, Cunningham JP (2019) Towards the neural population doctrine. *Curr Opin Neurobiol*.
- 869 Sedaghat-Nejad E, Herzfeld DJ, Hage P, Karbasi K, Palin T, Wang X, Shadmehr R (2019)  
870 Behavioral training of marmosets and electrophysiological recording from the cerebellum. *J*  
871 *Neurophysiol*.
- 872 Servick K (2018) Why are U.S. neuroscientists clamoring for marmosets? *Science* (80- ):383–  
873 384.
- 874 Shobe JL, Claar LD, Parhami S, Bakhurin KI, Masmanidis SC (2015) Brain activity mapping at  
875 multiple scales with silicon microprobes containing 1,024 electrodes. *J Neurophysiol*.

- 876 Solomon SG, Rosa MGP (2014) A simpler primate brain: The visual system of the marmoset  
877 monkey. *Front Neural Circuits*.
- 878 Steinmetz NA et al. (2021) Neuropixels 2.0: A miniaturized high-density probe for stable, long-  
879 term brain recordings. *Science* (80- ).
- 880 Steinmetz NA, Koch C, Harris KD, Carandini M (2018) Challenges and opportunities for large-  
881 scale electrophysiology with Neuropixels probes. *Curr Opin Neurobiol*.
- 882 Stevenson MF, Poole TB (1976) An ethogram of the common marmoset (*Calithrix jacchus*  
883 *jacchus*): General behavioural repertoire. *Anim Behav* 24:428–451.
- 884 Tomioka I, Nogami N, Nakatani T, Owari K, Fujita N, Motohashi H, Takayama O, Takae K,  
885 Nagai Y, Seki K (2017) Generation of transgenic marmosets using a tetracyclin-inducible  
886 transgene expression system as a neurodegenerative disease model. *Biol Reprod*.
- 887 Vöröslakos M, Petersen PC, Vöröslakos B, Buzsáki G (2021) Metal microdrive and head cap  
888 system for silicon probe recovery in freely moving rodent. *Elife*.
- 889 Walker JD, Pirschel F, Sundiang M, Niekrasz M, MacLean JN, Hatsopoulos NG (2021) Chronic  
890 wireless neural population recordings with common marmosets. *Cell Rep*.
- 891 Wolff SB, Ölveczky BP (2018) The promise and perils of causal circuit manipulations. *Curr Opin*  
892 *Neurobiol*.
- 893 Wu F, Stark E, Ku PC, Wise KD, Buzsáki G, Yoon E (2015) Monolithically Integrated  $\mu$ LEDs on  
894 Silicon Neural Probes for High-Resolution Optogenetic Studies in Behaving Animals.  
895 *Neuron*.
- 896 Yamada Y, Matsumoto Y, Okahara N, Mikoshiba K (2016) Chronic multiscale imaging of  
897 neuronal activity in the awake common marmoset. *Sci Rep*.
- 898 Yu HH, Rosa MGP (2014) Uniformity and diversity of response properties of neurons in the  
899 primary visual cortex: Selectivity for orientation, direction of motion, and stimulus size from  
900 center to far periphery. *Vis Neurosci*.
- 901

902 **Supplementary Figures**

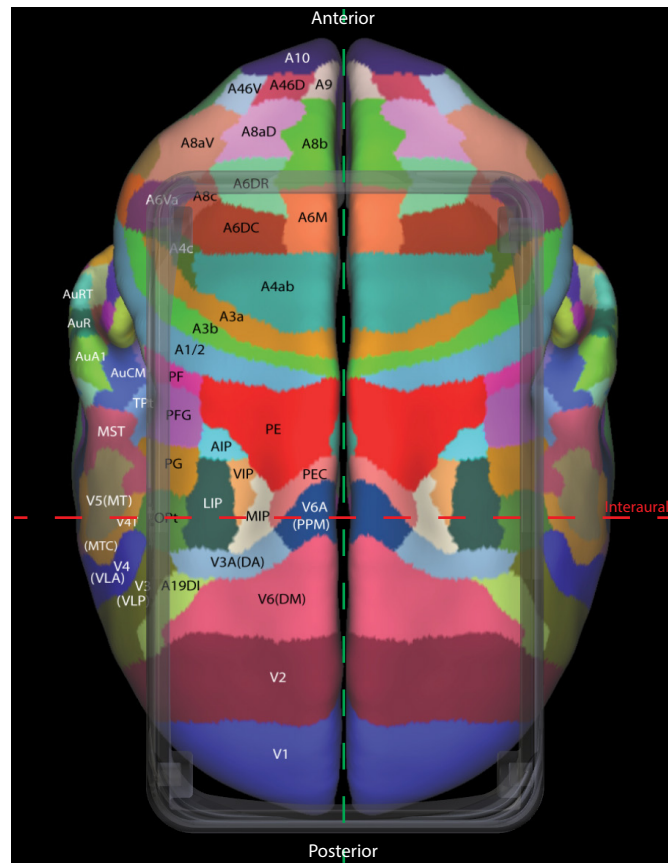

903

904 **Supplementary Figure 1 | Accessible cortical areas.** Top view of the chamber and cortical brain areas directly  
905 underneath. Red dashed line indicates interaural axis. Green dashed line indicates anterior-posterior axis. Area  
906 segmentation and labels from Paxinos et al. (2012).



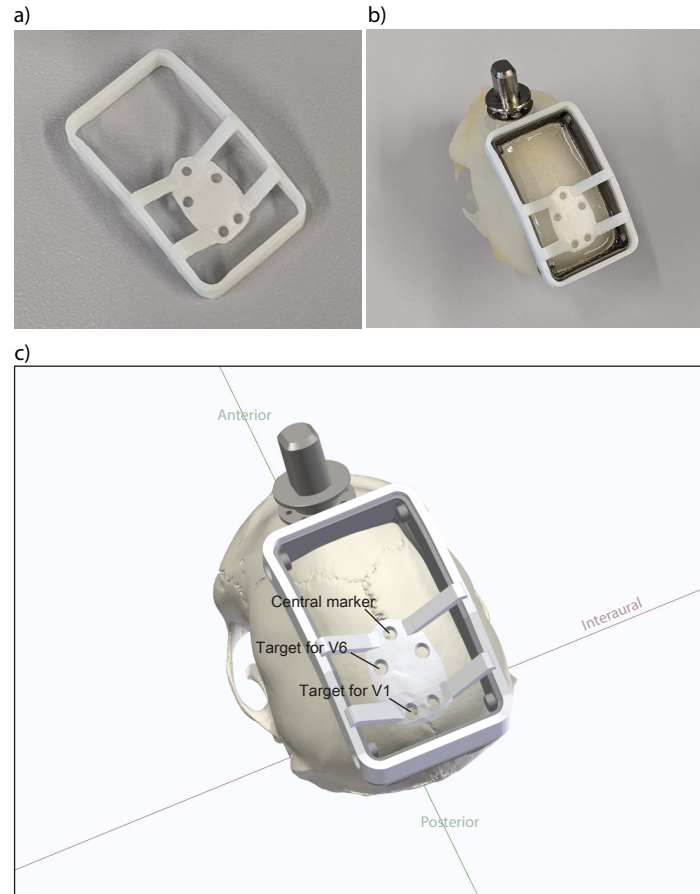

907

908 **Supplementary Figure 2 | 3D printed implantation target guide.** Photograph of the implantation guide (a) before  
909 and (b) after placement on the chamber. c) 3D rendering of the implantation guide placed on the chamber. The guide  
910 hole for the central marker indicates the anterior-posterior and medio-lateral center of the stereotaxic coordinate  
911 system. Guide holes for areas V1 and V6 are indicated for the left hemisphere.
